# Supplementary material for: The Early Identification of Flash Flood Disasters: Mechanism, Model and Uncertainty
Source: Copernicus journal article supplement (doi:10.5194/hess-2024-69), 2024-04-08
Supplement: Supplementary file [file hess-2024-69-RC2-supplement.pdf]

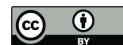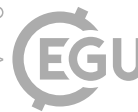

1 **The Early Identification of Flash Flood Disasters: Mechanism, Model and Uncertainty**

2

3 Zhengli Yang <sup>1,2</sup>, Heng Lu <sup>1,2,\*</sup>, Kai Song <sup>3</sup>, Zhijie Zhang <sup>4</sup>, Chao Liu <sup>1,2</sup>, Ruihua Nie <sup>1,2</sup>, Lei  
4 Ma <sup>5</sup>, Wanchang Zhang <sup>6</sup>, Chen Chen <sup>1,2</sup>, Min Zhang <sup>7</sup>, Gang Fan <sup>1,2</sup>

5 <sup>1</sup> *State Key Laboratory of Hydraulics and Mountain River Engineering, Sichuan University,*  
6 *Chengdu 610065, PR China*

7 <sup>2</sup> *College of Hydraulic and Hydroelectric Engineering, Sichuan University, Chengdu 610065,*  
8 *PR China*

9 <sup>3</sup> *Changjiang Survey, Planning, Design and Research Co., Ltd., Wuhan 430010, PR China*

10 <sup>4</sup> *School of Geography, Development & Environment, University of Arizona, Tucson, AZ,*  
11 *USA*

12 <sup>5</sup> *School of Geography and Ocean Science, Nanjing University, Nanjing 210093, PR China*

13 <sup>6</sup> *Key Laboratory of Digital Earth Science, Aerospace Information Research Institute,*  
14 *Chinese Academy of Sciences, Beijing 100094, PR China*

15 <sup>7</sup> *School of Environmental and Geographical Sciences, Shanghai Normal University,*  
16 *Shanghai 200234, China*

17 \* Corresponding author. Tel.: +86 13882221763. E-mail address: luheng@scu.edu.cn (Heng  
18 Lu).

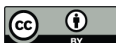

19 **Abstract**

20 Flash flood disasters are one of the major natural disasters in the world, and rapid and  
21 accurate early identification of flash flood disasters is the key to preventing and controlling  
22 them. In recent years, computer and spatial information technology development has  
23 promoted the advancement of early identification technology for flash floods. However,  
24 previous research has mainly focused on the impact of "water" and neglected the impact of  
25 "sediment" deposition on the rise of water levels. To gain a more comprehensive  
26 understanding of flash floods and improve the accuracy of early identification, this article  
27 first uses bibliometric methods to review the spatiotemporal distribution, internal  
28 relationships, and research hotspots of literature in this field over the past 42 years. Then, the  
29 research practice of considering the impact of sediment on the early identification of flash  
30 floods was introduced from three aspects: mechanism, model, and uncertainty. Finally, the  
31 existing problems in current research were discussed, and future research directions were  
32 proposed. The research results have shown that the number of publications in this field has  
33 been increasing yearly and will continue to increase, but the cooperation between authors is  
34 not close. The coupling effect between sediment replenishment and floods cannot be ignored.  
35 Taking into account multiple uncertainties can greatly improve recognition accuracy. This  
36 study can provide a panoramic literature perspective and practical research experience for  
37 relevant researchers and decision-makers and support further improving flash flood  
38 prevention and control capabilities.

39

40 **Keywords:** flash floods, early identification, bibliometrics, mechanisms, data driven,  
41 hydrodynamics, conceptual model, uncertainties.

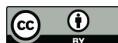

## 42 **1 Introduction**

43 The flash flood disaster is a typical global major natural disaster (Duan et al., 2016;  
44 Chinh et al., 2023), and the casualties (Convertino et al., 2019) and socio-economic losses  
45 (Sathya et al., 2021) caused by it every year account for a high proportion of all kinds of  
46 natural disasters. The flash flood events are widely distributed, with the characteristics of  
47 high nonlinearity, randomness, complexity, and concealment (Tu et al., 2020), and will  
48 continue to show an increasing trend in the future (Yan et al., 2021), which puts forward a  
49 strong demand for the study of flash flood disasters. The first phase of flash flood prevention  
50 and control is the early identification of disaster-prone areas (Li et al., 2021), which can be  
51 taken as an economical and effective prevention means of flash flood disasters to estimate the  
52 time, place, and scope of future flash floods (Costache et al., 2020).

53 In recent decades, researchers have developed various early identification models  
54 based on the mechanism of flash flood disasters and have achieved significant results (Panahi  
55 et al., 2021; Suwanno et al., 2023). Although these early identification techniques are  
56 effective to a certain extent, the study of early identification of flash floods remains  
57 challenging due to the complex formation mechanism of flash flood disasters. Scholars with a  
58 great interest in this field have published many related research papers. Unfortunately,  
59 however, very few review papers are still in this field. Few people can make a systematic  
60 analysis based on bibliometric analysis and research practice, which makes it difficult to  
61 figure out the development process, research hotspots, and future research directions in this  
62 field. Despite this, we made objective statistics on applying GIS and RS in flash floods  
63 through bibliometric analysis (Ding et al., 2021). However, this is only an application  
64 analysis of the two technologies rather than a comprehensive review of early identification  
65 technologies. In 2022 (Yang et al., 2022), we began to focus on the research of early  
66 identification technology of flash floods, roughly sorted out the development process of this  
67 field by combining meta-analysis with visual analysis, initially established the knowledge  
68 framework for the research and provided future research directions. The prevention and  
69 control of most traditional flash flood disasters focus solely on the role of rainstorms in  
70 triggering floods (Liu et al., 2022) but do not consider the factor that local sediment  
71 deposition will raise the water level, resulting in insufficient accuracy in the early  
72 identification of flash flood disasters (Wang et al., 2019). Many cases of flash flood disasters  
73 (Gan et al., 2018) proved that the coupling effect of sediment and flash flood is the key factor  
74 triggering flash floods and often leads to “small floods and big disasters”. For example, a



75 mountain flood disaster in Puge is typical. In the same rainstorm, the left mountain gully was  
76 silted up due to excessive sediment deposition, which led to the rise of the water level, and 25  
77 people were killed when the river diverted. However, the mountain ditch on the right did not  
78 cause any disasters due to only floods and no sediment (Wang et al., 2019). Sediment  
79 accumulation raises the water level, causing general (medium and small) floods in  
80 mountainous rivers to suddenly increase sharply to the water level corresponding to floods  
81 that occur once every 50 years or even once every 1000 years, exceeding the local flood  
82 control standards. On the other hand, sediment accumulation causes local river blockage,  
83 leading to a sharp adjustment of the riverbed shape, changing the river regime and water flow  
84 conditions, and causing water and sediment disasters far greater than the effects of floods.  
85 Therefore, sedimentation is crucial for preventing and controlling flash floods. The  
86 significance of mastering this knowledge lies in combining nonengineering measures such as  
87 early identification techniques with engineering measures to reduce mountain flood disasters'  
88 water sediment coupling effect to a controllable range, providing an effective technical  
89 approach for predicting and warning mountain flood disasters. For this purpose, in recent  
90 years, we have carried out a series of systematic studies on the runoff generation and  
91 sediment yield, water-sediment movement, gully bed evolution, disaster-causing mechanism,  
92 and disaster-forming mode of flash floods. As shown in Fig. 1, seen from left to right, the  
93 range and intensity of natural external forces gradually decrease, while the range and  
94 intensity of human actions increase progressively. If each node on this chain can be  
95 controlled well, the losses caused by disasters can be reduced as much as possible (Li et al.,  
96 2021).

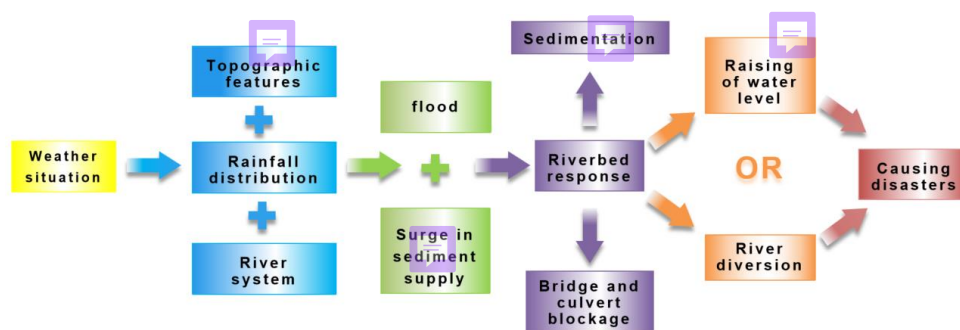

97

98 **Figure 1.** Complete chain of disaster caused by coupling of mountain torrents, water and sediment: The  
99 first column represents the triggering factors of flash floods in the weather situation (yellow); the second  
100 column represents environmental factors such as topographic features, rainfall distribution, and river  
101 systems (blue); the third column represents processes such as flood and Surge in sediment supply (green);



102 the fourth column represents the response of riverbed such as Sedimentation or Bridge and culvert blockage  
103 (purple); and the fifth column represents losses such as raising of water level and river diversion (red).  
104 Subsequently, the range and intensity of natural external forces gradually decreased, with the sixth column  
105 indicating the impact of disasters, and the range and intensity of human influence increased during this  
106 process. Adapted from Li et al. (2021).

107 The main objective of this paper is to build an updated and more extensive document  
108 sample database of early identification technology of flash floods, systematically sort out the  
109 internal relations of the documents, objectively analyze the development process and predict  
110 the development trend of this field, improve the research framework, and reveal the potential  
111 mechanisms and early identification methods of flash floods from the perspective of  
112 “water-sediment” based on our research practice. This paper is organized as follows: The first  
113 part introduces the research background of early identification technology of flash floods; the  
114 second part establishes the document sample database based on Web of Science (WOS for  
115 short) and Scopus platforms, and introduces the bibliometric analysis used; the third part  
116 clarifies the overall trend of documents published, spatial-temporal distribution and key  
117 research directions of this field through document characteristic analysis, co-word analysis  
118 and cluster analysis; the fourth part takes the joint action of flood and sediment as the starting  
119 point to explore the research progress of early identification technology of flash floods based  
120 on our research practice and the impact of sediment on flash floods: i) reveal the flash flood  
121 and sediment coupled disaster-causing mechanism (typical disaster-causing locations:  
122 steep-gentle transition reach, tributary confluence reach, curved reach, bridge and culvert  
123 reach); ii) propose the early identification methods for flash flood disasters (based on  
124 data-driven intelligent models and hydrodynamic models), and increase the coverage of early  
125 identification to over 40%; iii) analyze the uncertainty affecting early identification accuracy.  
126 In the end, this paper discusses the current major challenges and research gaps in this field  
127 and puts forward some suggestions for key issues (e.g., expansion of disaster-causing  
128 mechanisms of wide and narrow reaches, the broad prospect of applying models based on  
129 knowledge mapping, careful consideration of multiple uncertainties) to improve the accuracy  
130 of early identification results. The systematic review and gap identification use bibliometric  
131 tools to analyze the research status of existing literature, and the qualitative or quantitative  
132 research results formed will help improve the knowledge system of mountain flood disasters.  
133 Researchers and decision-makers can identify this article's current research focus and  
134 shortcomings and obtain some suggestions. In addition, a panoramic knowledge integration  
135 service can be brought to save research time.



## 136 2 Establishment of the document database and methodology

137 To establish a document database, as shown in Fig. 2, the keywords of “flash flood\*”  
138 and “identify\*” as well as the Boolean search criteria AND were first used to retrieve the core  
139 collections in the online platform of “Web of Science” and the peer-reviewed articles in  
140 “Scopus”. The search range included title, keyword, and abstract, and there was no restriction  
141 on the language. Then, the lists of references in all selected articles were checked and  
142 retrieved repeatedly from July 2022 to August 2023 to obtain a preliminary list of 2,240  
143 articles.

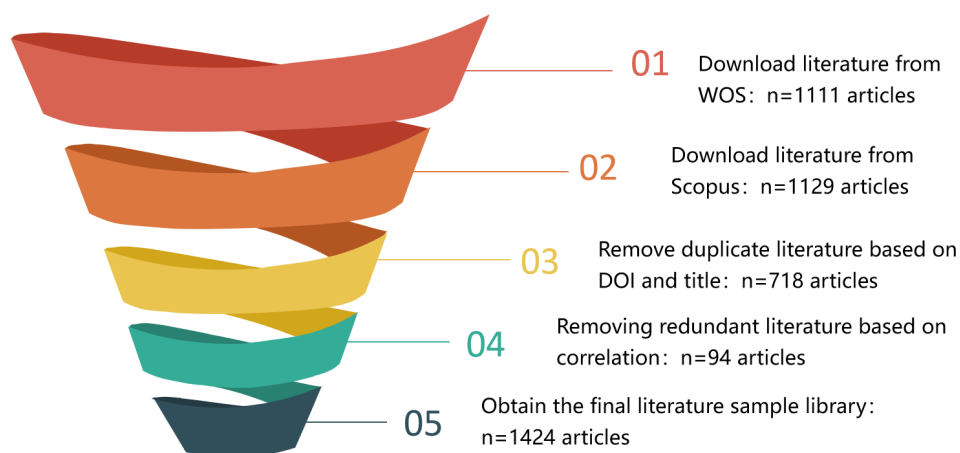

144  
145 **Figure 2.** Construction process of literature sample library.

146

147 Next, the articles in the preliminary list were thoroughly examined, and 718 duplicate  
148 documents with the same DOI and title were removed. A total of 94 uncorrelated or weakly  
149 correlated documents were manually excluded one by one. The keywords in the exclusion  
150 criteria included isotope, disease, microorganism, arsenic concentration and, cytology, etc.  
151 The final document sample database listed 1,424 articles published from January 1,1981 to  
152 August 18, 2023. The literature database uses both text data format (\*. ris, \*. txt) and table  
153 data format (\*. xls) for storage. The text data format is the standard format required by the  
154 metrology software, and the table format can be customized as shown in Table 1.

155

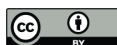

156 **Table 1**  
 157 Establishment status of the document database.

| Type             | Data platform | Authors                     | Article Title                                                                                              | Source Title                                                                                                   | Abstract                                                                                                           | Times Cited |
|------------------|---------------|-----------------------------|------------------------------------------------------------------------------------------------------------|----------------------------------------------------------------------------------------------------------------|--------------------------------------------------------------------------------------------------------------------|-------------|
| Article          | WOS           | Prokešová et al., 2015      | ...: Spatial rearrangement of runoff-generating ...                                                        | Science of the total environment                                                                               | Nowadays, rapid growths of urban areas and associated land use/land cover (LULC)...                                | 11          |
| Review           | Scopus        | Guo et al., 2017            | Achievements and Preliminary Analysis on China National Flash Flood Disasters Investigation and Evaluation | Journal of geo-information science                                                                             | National Flash Flood Disasters Investigation and Evaluation project is ...                                         | 23          |
| Letter           | WOS           | Schumacher and Herman, 2021 | Reply to “Comments on ‘Flash Flood ...’”                                                                   | Journal of hydrometeorology                                                                                    | We applaud Gourley ...                                                                                             | 3           |
| Conference Paper | Scopus        | Minea et al., 2017          | <i>Identification of the potential flash floods risk areas in Romania using physiographic method</i>       | International multidisciplinary scientific geoconference surveying geology and mining ecology management, SGEM | In recent decades the increase of the frequency of flash-flood conditions requires a correct identification of ... | 1           |
| ...              | ...           | ...                         | ...                                                                                                        | ...                                                                                                            | ...                                                                                                                | ...         |

158

159 This article comprehensively uses bibliometric analysis tools such as Microsoft 365,  
 160 EndNote, Origin, VOSviewer, Citespace, etc. for literature feature analysis, co-word analysis,  
 161 and cluster analysis. Firstly, use Microsoft 365 to organize literature data in a unified format  
 162 and establish a literature database in conjunction with EndNote. In addition, EndNote is also  
 163 used for literature storage, reading, and auxiliary citation of references; Then, use Origin for  
 164 statistical calculations and draw a distribution map of literature features. Next, use  
 165 VOSviewer to draw a graph of the cooperation between the author and the country. Finally,  
 166 use Citespace to create a keyword clustering map.

167 **3 Bibliometric analysis results**

168 *3.1 Distribution of publication volume*

169 First, document characteristics analysis was made for 1,424 documents using the  
 170 self-installed results analysis and retrieval function of WOS and Scopus. Then, the latest



171 version of Excel in Microsoft 365 and Origin 2019 software were used to calculate and draw  
 172 the statistical diagram, as shown in Fig. 3.

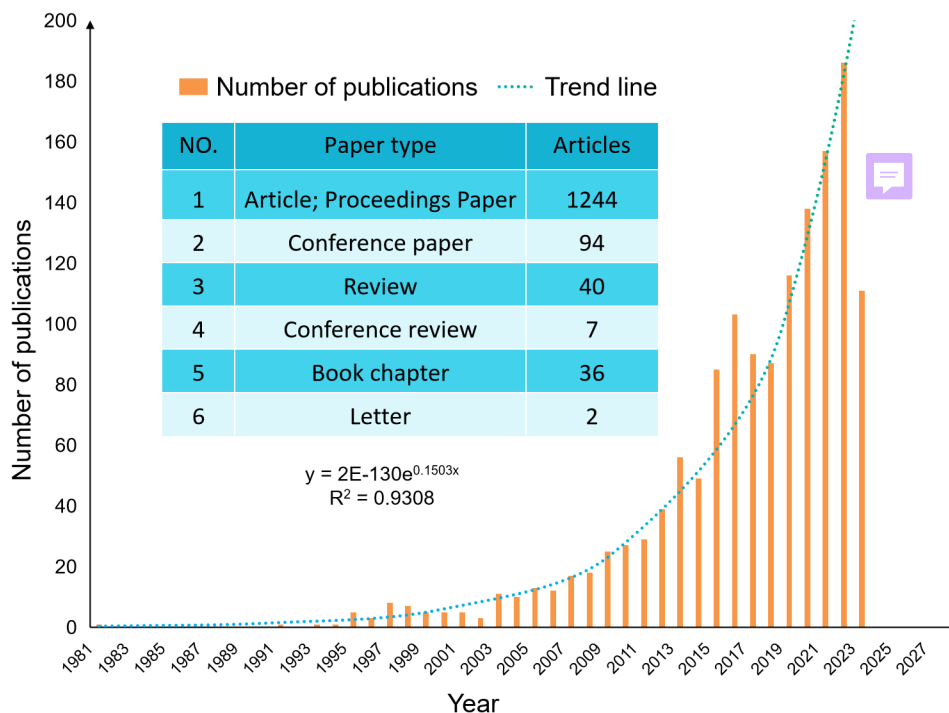

173  
 174 **Figure 3.** Number of publications: y is the number of publications, x is the year, the orange bar represents  
 175 the number of publications, the light blue dashed line represents the trend of fitting the number of  
 176 publications, and  $y = 2E-130e^{0.1503x}$  is the formula corresponding to the trend of fitting the number of  
 177 publications,  $R^2$  is the coefficient of determination.

178  
 179 One conclusion was that the research in this field has shown exponential growth. Judging  
 180 from the trend line that shows the predicted trend of documents published in the next four  
 181 years, many documents will still be published in this field in the next few years. Another  
 182 conclusion was that only 40 review documents were still very limited and accounted for only  
 183 2.8% of the sample database. Table 2 clearly shows that 2 of the top 10 highly cited  
 184 documents closely related to this paper were review documents, accounting for 20 % of the  
 185 top 10 highly cited documents, showing that there is a great demand for review documents,  
 186 but the total number of such papers is very few, therefore the review of papers should be  
 187 strengthened.



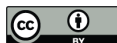

188 **Table 2**  
 189 Highly cited literature (TOP 10).

| NO. | Cite Frequency            | References            | Document type | Research contents                                                                                                                                                                                                                                         |
|-----|---------------------------|-----------------------|---------------|-----------------------------------------------------------------------------------------------------------------------------------------------------------------------------------------------------------------------------------------------------------|
| 1   | 738 (WOS)<br>761 (Scopus) | Prein, et al., 2015   | Review        | Convection-permitting mod-Els (CMP) is the main source of errors and uncertainties in large-scale models (LSM), and this review provides a common foundation for the CPM climate simulation theme                                                         |
| 2   | 418 (WOS)<br>444 (Scopus) | Marchi et al., 2010   | Article       | Summarized the characteristics of past flash floods, established methods for archival and statistical data, and described the characteristics of flash floods from the perspectives of climate and basin morphology                                       |
| 3   | 386 (WOS)<br>427 (Scopus) | Khosravi et al., 2018 | Article       | Proving that machine learning can quickly identify disaster-prone areas in advance, four decision tree-based machine learning models were tested, and the results showed that alternating decision trees (ADT) have the strongest decision-making ability |
| 4   | 301 (WOS)<br>312 (Scopus) | Merz and Bloschl 2003 | Article       | Propose a causal mechanism framework for identifying flood process types, examine feasibility through a large number of events and catchment areas, and analyze the statistical characteristics of each event type                                        |
| 5   | 273 (WOS)<br>293 (Scopus) | Borga et al., 2014    | Article       | Developing rainfall estimation and proximity forecasting plans, consolidating datasets, and integrating methods                                                                                                                                           |
| 6   | 267 (WOS)<br>296 (Scopus) | Youssef et al. 2011   | Article       | Using morphological analysis to estimate the flood risk level within a sub basin                                                                                                                                                                          |
| 7   | 162 (WOS)<br>182 (Scopus) | Islam et al. 2021     | Article       | Two hybrid ensemble models were applied and evaluated, demonstrating the ability to use advanced machine learning models for early identification of flash flood prone points                                                                             |
| 8   | 136 (WOS)<br>142 (Scopus) | Hampton et al. 2007   | Review        | Summarized the sheet flow process and explored the possibility of controlling its origin.                                                                                                                                                                 |
| 9   | 130 (WOS)<br>134 (Scopus) | Blöschl et al. 2008   | Article       | A distributed model was proposed to predict mountain torrents, and the problems encountered in modeling and modeling strategies were discussed                                                                                                            |
| 10  | 126 (WOS)<br>133 (Scopus) | Şpitalar et al. 2014  | Article       | Adopting interdisciplinary sociohydrological analysis of historical flash floods, the analytical framework for analyzing flash flood data and several factors affecting humans were discussed                                                             |

190

191 *3.2 Cooperation situation*

192 VOSviewer 1.6.16 was adopted for the scientometric analysis , helping to discover key  
 193 researchers and countries. Fig. 4 shows the co-word network diagram of the authors and the  
 194 countries or regions. Fig. 4 (a) and 4 (b) show the spatial distribution of the authors and the  
 195 countries or regions, and the color of the legend below represents the time when the paper  
 196 was published. It can be seen that over the past 40 years, compared with the cooperation



197 between countries, the distribution of authors is more discrete, and the connections between  
198 nodes are not close. Wang, z., Li, q., Liu, c., et al. are relatively active authors in recent years,  
199 while Jordan, Finland, Tanzania, and others are countries that have emerged in this field in  
200 recent years. Therefore, the research they carried out can be further followed up in the future.  
201 Fig. 4 (c) and 4 (d) show the authors' and countries' research heat maps, representing the  
202 strength of influence. It is not difficult to find that in Fig. 4 (c), authors Bodoque, j.m., Zhang,  
203 x., Borga, m., etc. are more influential authors, especially Borga, m., a highly cited author in  
204 Table 1. In Fig. 4 (d), USA, France, China, and India are the most influential countries.

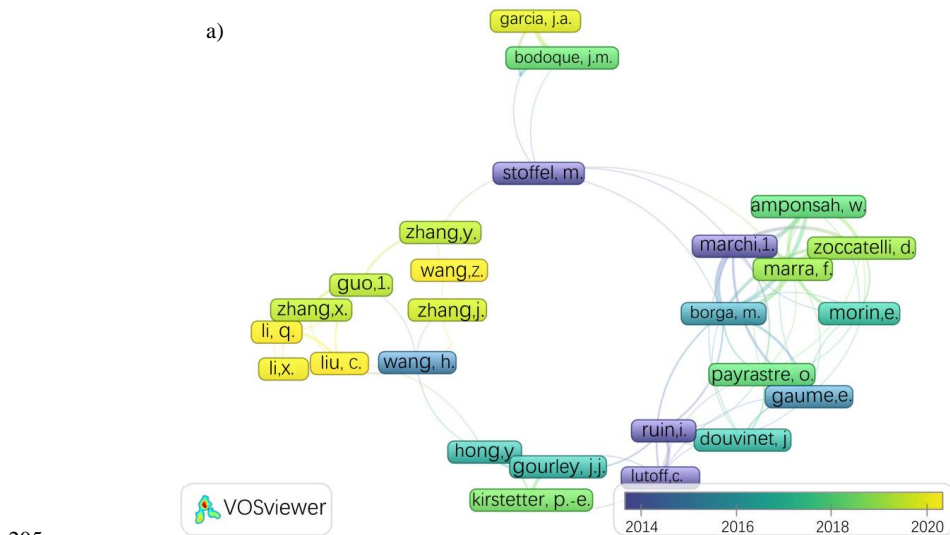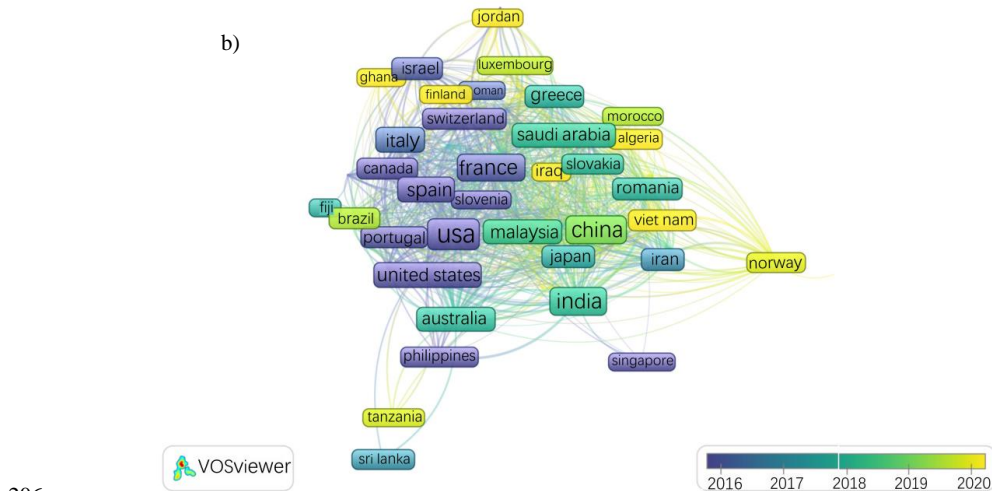

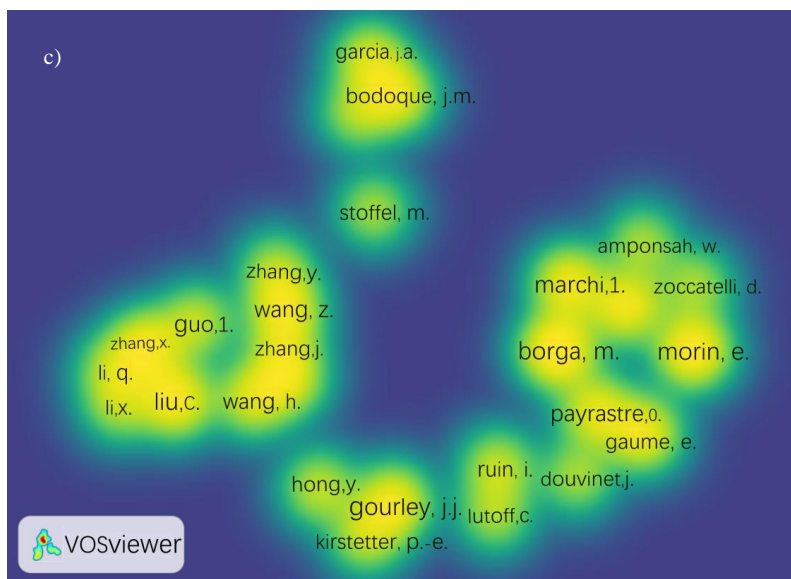

207  
208

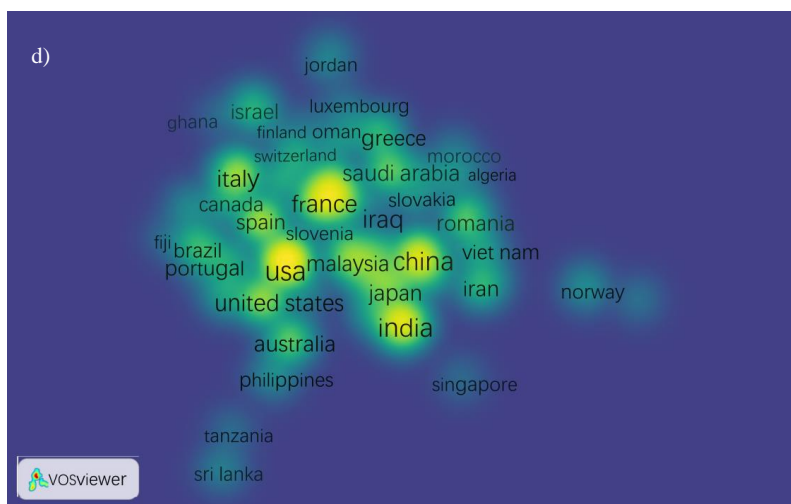

209

210 **Figure 4.** Visual network co-word analysis: a) author distribution label view, b) country or region  
211 distribution label view, c) author thermal diagram, d) country or region thermal diagram.

### 212 3.3 Research topic clustering results

213 CiteSpace R6.2.4 was used for cluster analysis, and 34 clusters were obtained. The  
214 network modularity of the cluster  $Q=0.4591>0.3$  indicates that each cluster's network  
215 correlation structure is more prominent. Fig. 5 shows the first 11 clusters, of which #0  
216 (weather forecasting) is the largest cluster. This is because short-duration heavy rainfall



217 triggers flash floods and can provide a powerful driving force and rapid and strong water  
 218 supply. The terms and documents involved in the cluster #9 (sediment transport) are most  
 219 closely related to the research contents of this paper, and the keywords are enlarged and  
 220 displayed in the circle on the right side of Fig. 5. It can be intuitively found that the keywords  
 221 of “rivers” and “sediment transport” are most prominent, showing that the evolution law of  
 222 sediment transport in the rivers is the content of the cluster that has the longest research  
 223 history and is most important.

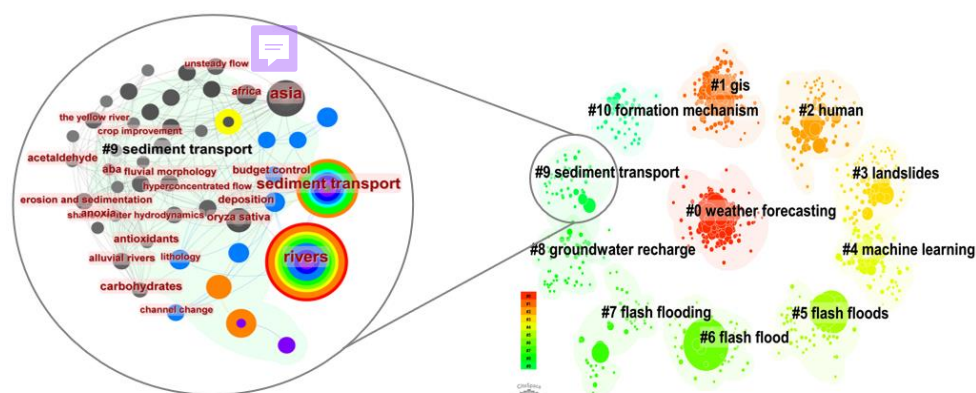

224  
 225 **Figure 5.** Research topic clustering results.

226 The cluster details were sorted by the number of co-cited publications, as shown in Table  
 227 3. The cluster #9 has the highest Silhouette value, indicating that the cluster has the best  
 228 structure and more reasonable internal similarity. The top five terms were listed in the table. It  
 229 is obvious that “bedload transport”, “desert”, “grain size” and “dynamics” are the key  
 230 research contents of cluster #9.

231

232 **Table 3**

233 Clustering of literature co-citation profiles.

| Cluster ID | Size | Silhouette | Mean (year) | LLR-based TOP5 term                                                                            |
|------------|------|------------|-------------|------------------------------------------------------------------------------------------------|
| 0          | 178  | 0.61       | 2010        | flash flood; soil water content; headwater catchment; tracking algorithm; watershed            |
| 1          | 139  | 0.572      | 2013        | flash flood; water conveyance system; southern italy; flow-like landslide; predicting property |
| 2          | 86   | 0.795      | 2008        | flooding; floods; article; disaster; human                                                     |
| 3          | 78   | 0.732      | 2005        | flash flood; hengduan mountains; spatiotemporal variation; heavy rainfall; risk assessment     |
| 4          | 77   | 0.797      | 2012        | flash flood; ANN; SVM; RF; deep learning                                                       |
| 5          | 76   | 0.881      | 2002        | flash flood; floods; flooding; backwater; romania                                              |



|    |    |       |      |                                                                                        |
|----|----|-------|------|----------------------------------------------------------------------------------------|
| 6  | 58 | 0.83  | 2000 | flash flood; mini disk tension infiltrometers; soil infiltration; hydrologic scaling   |
| 7  | 52 | 0.921 | 1992 | geomorphology; hydrology; flow of water; water levels; statistical methods             |
| 8  | 51 | 0.901 | 1996 | drylands; fractional exponential decay; precipitation; acacia pachyceras; arava valley |
| 9  | 46 | 0.943 | 2007 | sediment transport; bedload transport; desert; grain size; dynamics                    |
| 10 | 39 | 0.869 | 2009 | geomorphology; hydrology; frequency analysis; return period; water levels              |

234

#### 235 **4 Research practice on flash floods considering sediment effects**

236 Through the previous bibliometric analysis, we have learned that the research on  
237 disasters caused by the joint action of water and sediment is one of the important directions in  
238 this field. Therefore, this section focuses on exploratory research from the perspective of  
239 “water-sediment”, devoted to establishing an early identification model of a flash flood, water  
240 and sediment disaster-prone areas based on data-driven and water-sediment dynamics by  
241 revealing the flash flood and sediment coupled disaster-causing mechanism, and analyzes  
242 several sources of uncertainty affecting the evaluation results.

##### 243 *4.1 Mechanisms*

244 Based on the documents and survey results (Li et al., 2022b), flash flood and sediment  
245 disasters usually occur in steep-gentle transition reach (Li et al., 2022a), tributary confluence  
246 reach (Li et al., 2022), curved reach (Yuan et al., 2022), and bridge and culvert reach (Li et al.,  
247 2022c), which are mainly manifested in various disaster-causing modes such as the sharp rise  
248 of water level due to sediment deposition, river diversion and bridge and culvert clogging.

249 The disaster-causing mechanism of flash floods and sediment disasters shows that the  
250 flood carries great loads of sediment downstream, which leads to the sharp adjustment of the  
251 gully bed and the rise of the water level, thus causing disasters. In Fig. 6 (a), when the flash  
252 flood carries large amounts of sediment to move to the steep-to-gentle gully section, loads of  
253 coarse sediment are deposited to drive the rapid uplift of the riverbed. When the sediment in  
254 the flash flood gully flows into the next river channel, the sedimentation and the sharp rise of  
255 the water level will occur in the confluence area, causing disasters, as shown in Fig. 6 (b).  
256 When the sediment moves to the gentle slope curved section of the gully, the sediment will  
257 deposit, which could easily induce river diversion and cause disasters, as shown in Fig. 6 (c).  
258 Suppose water-blocking facilities such as cross-ditch bridges and culverts are in the gully. In



259 that case, the rise of the local water level will result in decreased flow velocity, reduced  
260 sediment-carrying capacity of flow, culvert clogging due to sediment deposit, raised water  
261 level or induced river diversion, thus causing disasters, as shown in Fig.6 (d).

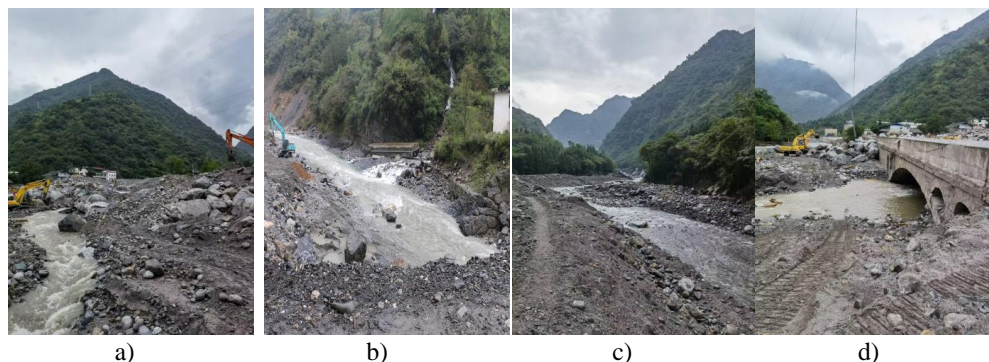

262 **Figure 6.** The frequent occurrence of mountain flood, water and sand coupling disasters in Sichuan  
263 Province, China, based on the national historical flash flood disaster database, on-site research on typical  
264 mountain flood, water and sand disasters, and model experiments, it was found that flash flood and sand  
265 disasters usually occur in these areas: a) steep and gently connected river sections, b) tributary and  
266 confluence river sections, c) curved river sections, d) bridge and culvert river sections (photo taken by  
267 author).

268 Based on field investigation (Hu et al., 2022), laboratory tests (Zhou et al., 2021b) and  
269 theoretical analysis (Zhou et al., 2021a), researchers have analyzed the change of scouring  
270 and siltation in the river channel caused by the change of water and sediment conditions. Li et  
271 al. (2021b) discovered that the chain characteristics of flash flood and sediment disasters can  
272 be summarized as orderly predictability of chain nodes, amplification of water and sediment  
273 variation disasters and coupling of disaster-causing factors at the watershed scale. The details  
274 are as follows:

- Orderly predictability of chain nodes

276 In the chain of rainstorms, flash floods and sediment disasters, according to the time  
277 development process and the influence of the spatial combination of disaster-causing factors,  
278 the chain nodes such as weather situation, rainfall distribution, topography, river system,  
279 water and sediment process, submergence, loss and disaster impact are orderly and  
280 predictable.

- Amplification of water and sediment variation disasters

282 Rainstorms, flash floods and sediment disasters are orderly and predictable. However, in  
283 the actual rainstorm and flash flood process, due to the special distribution and coupling of  
284 various wading structures, sediments, and disaster-bearing bodies in the watershed, there will



285 be abnormal variations in sediment yield and runoff generation, which is caused by the bridge  
286 and culvert blocking or outburst, the sediment erosion and deposition and the combined  
287 effects of various factors. Also, serious disasters may occur even if the rainfall is relatively  
288 common. Therefore, the variation of water and sediment has obvious disaster amplification  
289 effects.

290 ● Coupling of disaster-causing factors at the watershed scale

291 As a triggering factor, with strong kinetic energy, the rainstorms in mountainous regions  
292 can make the material and energy in the watershed increase sharply in a short time,  
293 destroying the watershed's equilibrium state before rain (Ye et al., 2021). Different disasters  
294 will occur if the flood submergence area is inhabited or equipped with disaster-bearing bodies  
295 such as transportation, communication, factories and mines, enterprises, etc. Regarding the  
296 occurrence process, water and sediment disasters have nodes such as weather situation,  
297 rainfall distribution, topography, river system, water and sediment process, submergence and  
298 loss, etc (Li et al., 2023). However, the chain characteristics of water and sediment disasters  
299 reflect that various disaster-causing factors are coupled at the watershed scale (Liu et al.,  
300 2021; Ran et al., 2022). For the intersection of the gullies, the coupling of disaster-causing  
301 factors in the higher-level watersheds of water and sediment deposits should be provided as  
302 well.

303

304 *4.2 Early identification models*

305 The factors of flash flood and sediment coupling include rainfall and topography, river  
306 dynamics-related factors such as river channel type and sediment movement. The traditional  
307 method of predicting the evolution of flash floods based on hydrological models may  
308 misestimate the degree of disaster or underestimate the risk of disaster when rainstorms and  
309 flash floods occur. In particular, it cannot effectively identify and predict the “small floods  
310 and big disasters” caused by the uplift of the river channel. To solve the problem of wide  
311 distribution and strong concealment of flash flood disasters, we proposed early identification  
312 methods for flash flood and sediment disaster-prone areas at the regional and reach scales,  
313 respectively.

314 *4.2.1 Data-driven based intelligent model*

315 Due to a lack of consideration of sediment factors, the traditional data-driven  
316 identification methods for flash flood disaster-prone areas make it difficult to identify the  
317 flash flood and sediment disaster-prone areas induced by heavy rainfall and sediment deposits.



318 The fast and accurate acquisition of the spatial distribution and area of the landslide areas can  
 319 provide important support for the early identification (Zhang et al., 2022). He et al. (2020)  
 320 proposed a regional landslide extraction method. Bai et al. (2023) applied a landslide area  
 321 extraction technology based on UAV image and deep learning to effectively combine deep  
 322 learning in the computer field. Yuan et al. (2022) incorporated landslide deposits into the  
 323 data-driven model as a deposit factor. They combined traditional flash flood disaster  
 324 predictive factors such as topographic data, geological data, and hydrological data to  
 325 construct a model of influencing factor contribution-ensemble learning coupling to obtain the  
 326 data-driven early identification methods. The technical flowchart is shown in Fig. 7.

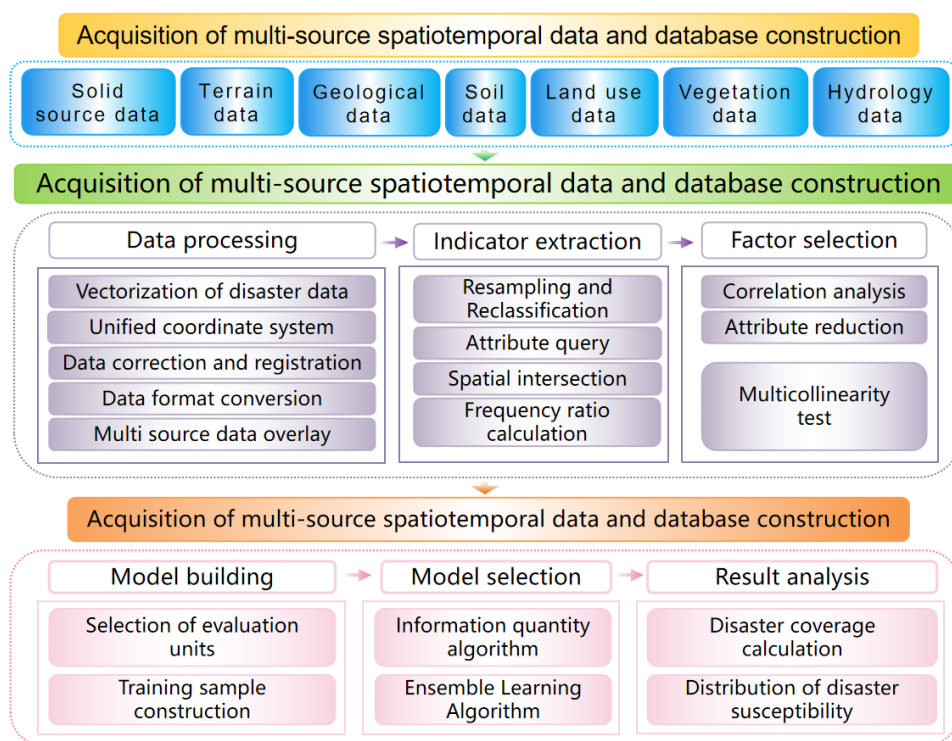

327  
 328 **Figure 7.** Data driven model technology flowchart.

329 The spatial superposition analysis was made for the spatial distribution of the frequency  
 330 ratio of the positive and negative sample influencing factors in the research area. The  
 331 frequency ratio, amount of information, and certainty coefficient of the influencing factors  
 332 were output to the disaster susceptibility interval  $([0, 1])$  as the input item of two ensemble  
 333 learning classification algorithms in the form of a one-dimensional vector through the  
 334 ensemble learning classification algorithm tool in the MeteoInfo integration framework (Liu





335 et al., 2022). By comparing output results and existing flash flood risk investigation and  
336 assessment results, the national flash flood risk investigation and assessment research (FFIA)  
337 has become a more recognized research result in the field. Taking FFIA as the reference  
338 object and the coverage rate of disasters in high-risk areas as the evaluation index, the results  
339 in Aba area were evaluated (Yuan et al., 2022), as shown in Fig. 8. The results are as follows:

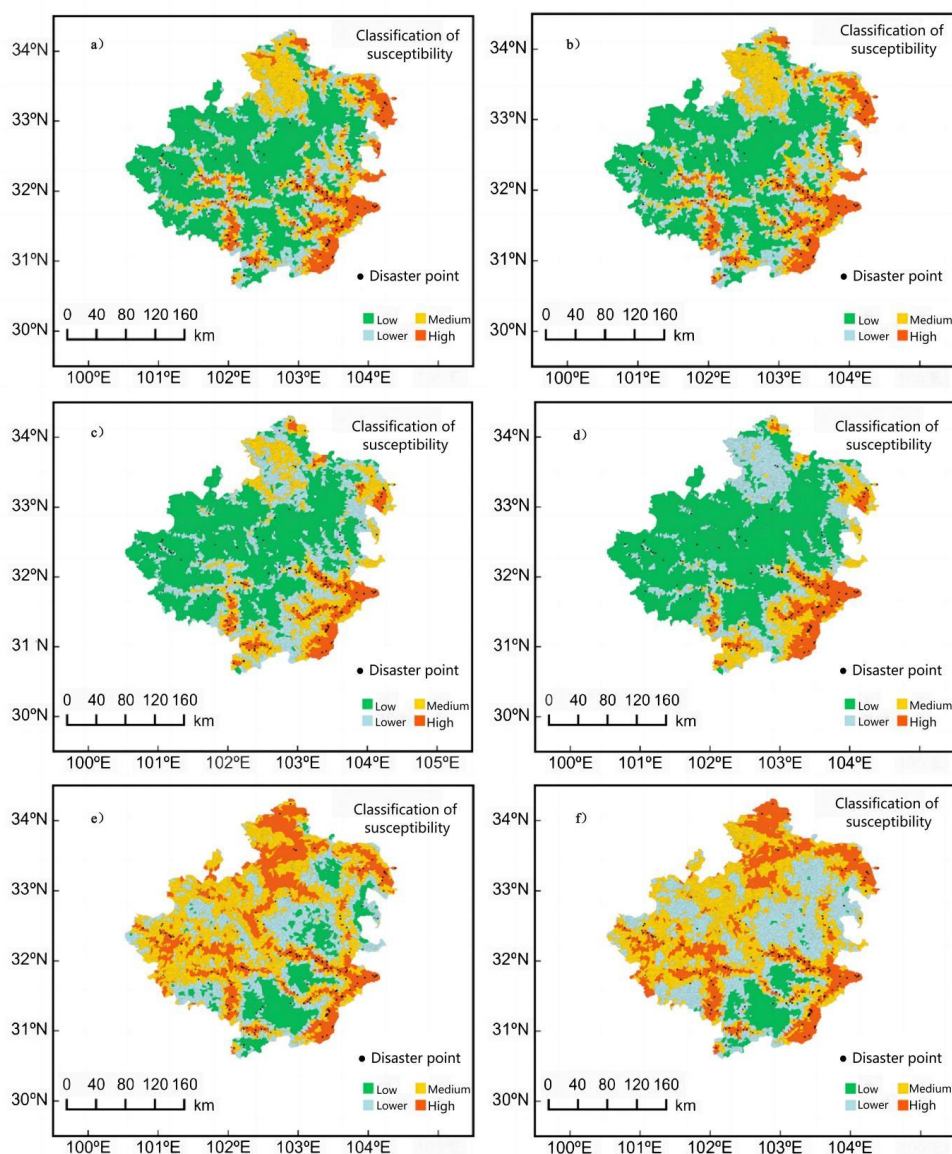

340  
341

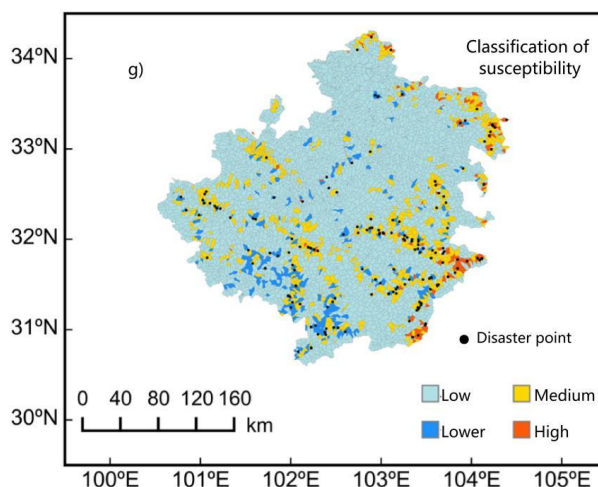

342  
343 **Figure 8.** The identification results of this high-risk area: a) frequency ratio adaptive  
344 enhancement model, (b) frequency ratio random forest model, (c) information quantity  
345 adaptive enhancement model, (d) information quantity random forest model, (e) certainty  
346 coefficient adaptive enhancement model, (f) certainty coefficient random forest model, and (g)  
347 FFIA data.

348 Compared with the FFIA data, the coverage in high-prone areas increased by  
349 23.2%-45.4% in the data-driven results. Specifically, the coverage rate of the frequency  
350 ratio-adaptive enhancement model in high-prone areas increased by 40.5% compared with the  
351 FFIA result; the coverage rate of the frequency ratio-random forest model in high-prone areas  
352 increased by 41.2% compared with the FFIA result; the coverage rate of the information  
353 amount-adaptive enhancement model in high-prone areas increased by 23.7% compared with  
354 the FFIA result; the coverage rate of the information amount-random forest model in  
355 high-prone areas increased by 23.2% compared with the FFIA result; the coverage rate of the  
356 certainty coefficient-adaptive enhancement model in high-prone areas increased by 42.7%  
357 compared with the FFIA result; the coverage rate of the certainty coefficient-random forest  
358 model in high-prone areas increased by 45.4% compared with the FFIA result.

#### 359 4.2.2 Hydrodynamic model

360 Due to the complex topography and wide coverage of the mountainous watersheds

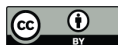

361 (Faisal et al., 2023), water-sediment dynamic models can be used to simulate the target  
362 object's water-sediment coupled movement to accurately identify the early disaster-prone  
363 areas (Imaizumi et al., 2008). Many scenarios need to be simulated in the early stage,  
364 including different conditions of rainfall, flow and sediment movement. However, the  
365 workload is huge and the cost of workforce and material resources is too high. Meanwhile,  
366 the rivers in mountainous areas have complex geometry (Lin et al., 2023), and  
367 flood-obstructing buildings such as steep-gentle transition reaches, tributary confluences,  
368 curved reaches, bridges and culverts are widely distributed, which can easily lead to spatial  
369 heterogeneity distribution (Deal et al., 2023). We have constructed a set of quantitative  
370 methods based on hydrodynamic methods propose the determination conditions of  
371 danger-hidden reaches such as steep-gentle transition reach, tributary confluence reach,  
372 curved reach, bridge and culvert reach.

#### 373 ● Steep-gentle transition reach

374 Under the condition of saturated sediment transport, if the sediment transport capacity of  
375 the upper reach is greater than that of the lower reach, it will lead to sedimentation in the  
376 lower reach, raise the riverbed, and sharply increase the water level. Moreover, it will reduce  
377 the gradient of the lower gully bed, further widen the sediment transport capacity gap  
378 between the upper and lower reaches, and result in more serious sedimentation and raised  
379 water levels. Flash flood and sediment disasters such as silting and submergence can easily  
380 occur during this process. For the steep-gentle transition reaches, due to the different riverbed  
381 gradients, the bed load transport rate will change near the transition reach. The sediment  
382 transport-gradient empirical formula of the steep-gentle transition reach is as follows:

$$383 \quad \frac{g_{s1}}{g_{s2}} \sim \left( \frac{S_1}{S_2} \right)^{3/2} \quad (1)$$

384 Where  $g_s$  is the saturated bed load transport rate,  $S$  is the bed gradient, Subscript 1 is the  
385 upper reach and Subscript 2 is the lower reach.

#### 386 ● Tributary confluence reach

387 In the tributary confluence of the mountainous rivers, affected by the characteristics of  
388 incoming water and sediment of the major tributary, the disaster is mainly due to the mutual  
389 backwatering between main stream and tributary and the large gradient of tributaries. If the  
390 water flow meets in the confluence, the upper reach forms the backwater area, the lower  
391 reach forms the flow separation area, which is easy to cause sediment deposition. Meanwhile,  
392 the cross-section of the river is reduced, and the conveyance capacity is reduced. The large  
393 tributary gradient and excessive incoming sediment will also lead to siltation and



394 submergence in the confluence area, thus inducing major flash floods and sediment disasters.  
395 The momentum expression formula of the tributary confluence reach based on river width  
396 and gradient was proposed as follows:

$$397 \quad \frac{M_1}{M_2} = \frac{B_1 J_1}{B_2 J_2} \quad (2)$$

398 Where  $M$  is the water flow momentum,  $B$  is the river width,  $J$  is the gradient, Subscript 1  
399 is the tributary, and Subscript 2 is the main stream.

#### 400 ● Curved reach

401 The mechanism of disasters in the curved reach is multifaceted (Yuan et al., 2021). First,  
402 the tortuous river channel and the unevenly distributed water velocity are easy to form  
403 high-velocity and low-velocity flow areas, resulting in the local intensification of flood  
404 disasters. Then, the curvature of the river channel and the inertia effect of the fluid will lead  
405 to streamlined bending and twisting, and whirlpools and vortexes, and further raise the local  
406 water level of the river channel to form clogging and poor flood discharge. In addition, the  
407 curvature of the river channel will also affect the transport of sediment and result in  
408 sedimentation, inadequate dredging and narrowing of the river channel, thus affecting the  
409 river channel's carrying capacity and drainage capacity and increasing the risk of flood  
410 disasters. We have found that the ratio of the disaster-causing water depth between the curved  
411 reach and the lower reach should meet Formula (3), that is, whether it is a criterion for  
412 determining the flash flood disaster-prone areas:

$$413 \quad \frac{h_1}{h_2} = \left(\frac{B_2}{B_1}\right)^{3/5} \left(\frac{J_2}{J_1}\right)^{3/10} \geq \frac{h_{1\text{beach}} + h_0}{h_{1\text{beach}}} \quad (3)$$

414 Where  $B$  is the average river width,  $J$  is the riverbed gradient,  $h_{1\text{beach}}$  is the flood land  
415 line water level when the curved reach is submerged and  $h_0$  is the water depth required for  
416 disaster prevention.

#### 417 ● Bridge and culvert reach

418 Bridges and culverts are often built on the gullies of the mountainous rivers for local  
419 residents to pass through. However, due to the simple structure and low building standards  
420 (low flood control standards), these bridges and culverts play a role in obstructing floods  
421 when flash floods occur. In recent years, it has been found that clogging occurs when coarse  
422 sediments and floating woods pass through these low-standard bridges and culverts (Brussee  
423 Anneros et al., 2021). Therefore, building low-standard bridges and culverts is also an  
424 important factor in early disaster identification. In the process of identification, if it is found  
425 that the bridge and culvert foundations occupy the conveyance channel of the gully, it is  
426 determined as a disaster-prone area.



427 We applied the method based on hydrodynamic methods to the risk identification in Aba  
 428 Prefecture, drew the flash flood disaster point distribution map of Aba Prefecture via ArcGIS  
 429 and set the FFIA results as the base map for comparison, as shown in Fig. 9. Taking the  
 430 coverage rate of disasters in high-risk areas as the evaluation index, the disaster coverage rate  
 431 in the results of FFIA was 16.5%. Compared with the results of FFIA, the methods increased  
 432 by 52.3%. Many flash flood disasters in low and medium risk areas were successfully  
 433 identified.

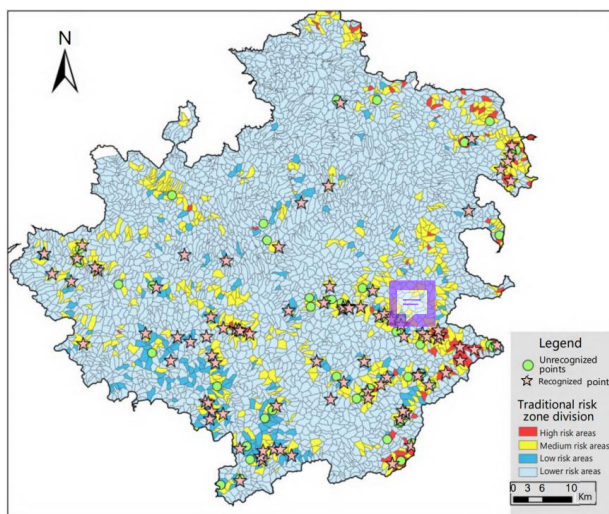

434  
 435 **Figure 9.** Comparison of research results based on hydrodynamic methods and national flash  
 436 flood risk investigation and assessment.

437 *4.3 Uncertainties*

438 Previous studies have shown that the uncertainties of influencing factors, multi-source  
 439 spatiotemporal data, models, and evaluation units will affect the reliability and accuracy of  
 440 the evaluation results, as shown in Table 4. This section analyzes the sources of uncertainty  
 441 based on the model evaluation results, and the details are as follows.

442

443 **Table 4**

444 Typical cases that have an impact on evaluation results.

| No. | Influencing factors                | Case Studies       | Description                                                           |
|-----|------------------------------------|--------------------|-----------------------------------------------------------------------|
| 1   | Uncertainty of influencing factors | Zhang et al., 2022 | Heavy rainfall is the main driving factor for triggering flash floods |



|     |                                                 |                    |                                                                                                                                                                 |
|-----|-------------------------------------------------|--------------------|-----------------------------------------------------------------------------------------------------------------------------------------------------------------|
| 2   | Uncertainty of multi-source spatiotemporal data | Emery et al., 2016 | The evaluation results of the model largely depend on the selected parameters and influence range, and different data may lead to different sensitivity indices |
| 3   | model uncertainty                               | Majhi et al., 2022 | The uncertainty of Global Climate Model(GCM) is the most sensitive to regional rainfall characteristics, followed by elevation                                  |
| 4   | Uncertainty of evaluation units                 | Lee et al., 2004   | Using a GIS data platform to evaluate the impact of evaluation units on prediction results                                                                      |
| ... | ...                                             | ...                | ...                                                                                                                                                             |

445

446 *4.3.1 Uncertainty of influencing factors*

447 Typical flash flood disaster events have shown the characteristics of high coupling of  
 448 various disaster-causing factors (Špitalar et al., 2012). Therefore, the in-depth analysis of the  
 449 uncertainty of early identification and influencing factors of flash floods is of great  
 450 significance for improving the identification accuracy. There is still no unified view on the  
 451 causes of flash flood and sediment disasters due to the complexity of the environment and the  
 452 different development stages. We developed a method to predict the uncertainty of “rainfall  
 453 process-flood process-water and sediment coupling process” stage by stage, studied the  
 454 relationship between rainfall and sediment transport rate under different rainfall conditions to  
 455 identify rainfall patterns, and compared the relationship between the evaluation factors of  
 456 FSDS (Flood and Sediment Disasters Susceptibility) and the disasters fitted by different  
 457 algorithms to draw maps by the most reasonable and efficient methods. To improve the  
 458 accuracy of early identification, it is recommended to consider the evaluation factors related  
 459 to the occurrence of disasters as much as possible and adopt multi-source data obtained from  
 460 multiple channels for analysis.

461 *4.3.2 Uncertainty of multi-source spatiotemporal data*

462 The data involved of flash flood disasters include real-time rainfall, soil water content,  
 463 field investigation, disaster analysis and evaluation, prediction model, early warning model,  
 464 document data, etc. (AL-Areeq et al., 2023). These data have strong multi-source  
 465 heterogeneity and highly dynamic spatiotemporal characteristics, which challenges disaster  
 466 data collection, storage, and calculation (Li et al., 2022). In investigating and studying early  
 467 flash flood and sediment disasters, researchers conducted on-the-spot investigations on the  
 468 disaster occurrence sites to obtain geological, topographic, and geomorphological factors.  
 469 They completed early identification under the condition of early multi-source data according  
 470 to the geological and topographical maps. Chen et al. (2021) realized the raw data acquisition  
 471 of sensors and various sources and carried out preprocessing such as storage, cleaning,



472 conversion, and dimension reduction to construct the associated database. Currently, the data  
473 is mainly acquired through the field investigation of researchers (Siebert et al., 2016) and the  
474 measurement of relevant information on the disaster areas by satellite remote sensing (He et  
475 al., 2020). The topographical map, vegetation coverage, rainfall, and other related data can be  
476 obtained through the above measurement methods to constitute a data set for early  
477 identification. Establishing a deep learning sample database and verifying deep learning  
478 automatic interpretation accuracy can provide data guarantee. We conducted spatial analysis  
479 and integrated multi-source data based on the GIS platform to form basic data for early  
480 identification. Since different methods and means measure multi-source data and have  
481 differences in format, spatial resolution, coordinate system, etc., it is suggested that the basic  
482 data should be unified to the same standard before being used in the early model construction.

#### 483 *4.3.3 Uncertainty of models*

484 In addition to the uncertain influencing factors and multi-source spatio-temporal data,  
485 inconsistent input parameters, inaccurate initialization, and uncertain model structures will all  
486 lead to the uncertainty of early identification models (Jafarzadegan et al., 2021). In view of  
487 the strong uncertainty, further research and reliability evaluation of the models are needed to  
488 reduce the uncertainty of the model results (Abbaszadeh et al., 2021). It is particularly  
489 important to carefully select the identification models in the calculation process. Under equal  
490 identification accuracy, different models will have other distribution characteristics.  
491 Therefore, it is still difficult to conclude which identification model is more conducive to  
492 modeling. Previous studies have shown that compared with a single model, based on  
493 balancing the model identification accuracy and computational burden as much as possible,  
494 various coupling models (Ahmadisharaf et al., 2018), integrated models (Tehrany et al., 2014)  
495 and hybrid models (Moftakhari et al., 2019) have more advantages in model fitting and  
496 prediction performance.

#### 497 *4.3.4 Uncertainty of evaluation units*

498 The reasonable selection of evaluation units is very important to reduce the uncertainty of  
499 evaluation units. In previous studies, the grid unit was directly used as the evaluation unit.  
500 Different susceptibility zones were often divided in a single watershed, but the integrity of  
501 disaster occurrence was ignored, which is inconsistent with the actual environment and not  
502 conducive to accurately identifying flash flood disasters (Sun et al., 2019; Duan et al., 2022).  
503 To solve the zone differences in a single watershed, we divided the susceptibility results  
504 calculated by the grid units in the form of watershed units, took the average value of



505 susceptibility in each sub-watershed as the unit value of the sub-watershed in the research  
506 area, and divided it into four levels by natural discontinuity methods to obtain the  
507 susceptibility classification of flash flood and sediment disasters based on watershed units.

## 508 **5 Discussion**

### 509 *5.1 The potential of bibliometric methods*

510 Based on the previous bibliometric analysis, this paper further analyzes the evolution  
511 law of keywords in this field. It applies Citespace to obtain the time zone map of the  
512 evolution law of the main keywords related to the “sediment transport” over time. Fig. 10  
513 reflects the evolution of flash flood and sediment transport research from sporadic research in  
514 hydrology (flash floods and floods) in 1981 to intensive research in natural disasters (debris  
515 flows, erosion, infiltration, etc.) after 1990. Subsequently, the research shifts its focus to  
516 underlying surface correlations (e.g., digital elevation model, lithology) and then to the  
517 characteristics of the river channel (e.g., bank erosion, rivers, fluvial morphology, etc.).  
518 Through these evolution processes, it is not difficult to find that the field is gradually paid  
519 attention to the impact of sediment and shifted the previous focus from the single research to  
520 the integrated research of multiple disciplines and from the influence of single factors to the  
521 comprehensive influence of multiple factors.

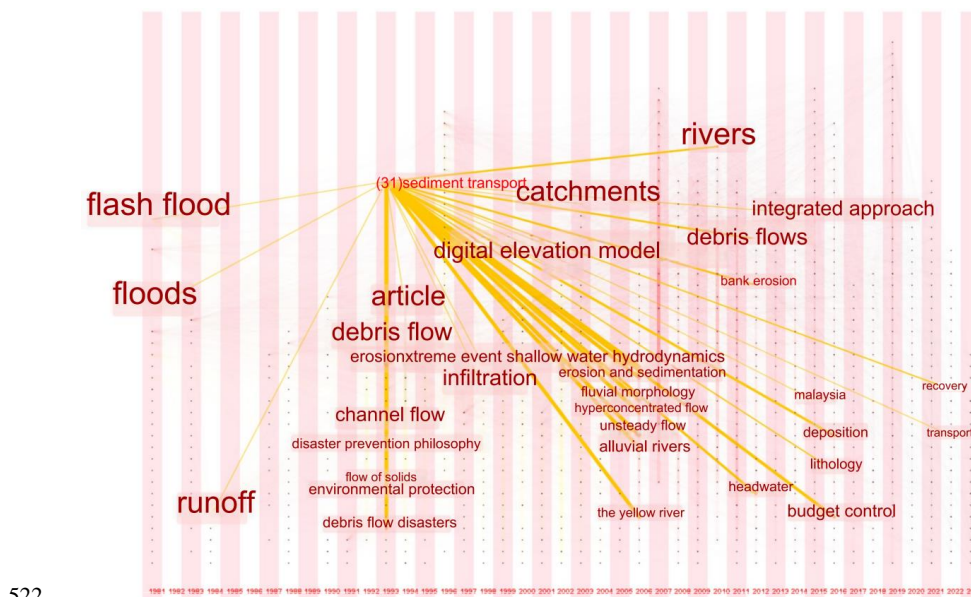

522

523 **Figure 10.** Research time zone map: the red five pointed star marks the theme keyword "sediment  
524 transport", and the lines connect the related keywords. The thicker the lines, the closer the connection





525 between the keyword and "sediment transport". The size of the keyword font on the graph represents the  
526 frequency of occurrence, and the more frequent the occurrence, the more font the keyword has. .

527 In addition, due to the difficulty of processing mass data, this study only considers  
528 peer-reviewed papers, but not other materials in this field, such as government reports, news  
529 reports, webpage information, and other non-academic documents. Meanwhile, the initially  
530 set keywords may not cover all articles in the field, and measurement software can only be  
531 used to identify important nodes, which may ignore some valuable documents. Therefore, the  
532 document sample database needs to be constantly updated in future research to conduct more  
533 extensive and in-depth research.

534

### 535 *5.2 Research on Expanding Wide and Narrow River Sections*

536 Documents show that the research on the disaster-causing mechanism of flash floods has  
537 gradually developed from qualitative analysis to quantitative analysis (Chen et al., 2020;  
538 Ding et al., 2023; Chen et al., 2023). However, the field still need to be studied thoroughly  
539 and continuously to enhance the understanding of the water and sediment coupled  
540 disaster-causing law. For example, the research on the coupled disaster-causing mechanism of  
541 water and sediment in wide and narrow rivers must be expanded. Due to the influence of  
542 hydrological characteristics, geological structure, and other factors, the river is generally  
543 characterized by a plane shape consisting of a narrowed valley section and a widened  
544 non-valley section. The wide and narrow river channel is the most common river pattern in  
545 mountainous rivers. The narrowed section of the river channel usually has an obvious  
546 bayonet effect. The restricted section in the non-flood period is characterized by the drop,  
547 with shallow water depth, large flow velocity (Yan et al., 2022). The drop effect of the  
548 narrowed section in the flood period should be weakened, the flow velocity should be slowed  
549 down, and the sediment transport rate should be greatly reduced. We verified the water level  
550 along the research reach in the laboratory test (Yan et al., 2021). The preliminary findings  
551 show that in the wide and narrow river channel, a large amount of sediment from the upper  
552 reach will cause sedimentation in the widened section and scouring in the narrowed section,  
553 forming typical shoal and step-pool bed forms and uplifting the riverbed. It can be seen that  
554 the change in river width is one of the key factors affecting flood discharge in mountainous  
555 rivers, and the mechanism research of this kind of reach should be strengthened in the future.

556

### 557 *5.3. Early identification model based on knowledge graph*



558 In summary, the early identification models of flash floods mainly include hydrological  
559 information-based models (Guo et al., 2022), data-driven models (Ge et al., 2023),  
560 hydrodynamics-based models (Bonnifait et al., 2002), knowledge mapping-based models  
561 (Chen et al., 2023), etc. Among them, the knowledge mapping-based model is a relatively  
562 cutting-edge model that has recently attracted much attention in geoscience (Zhang et al.,  
563 2022). The mapping refers to the atlas compiled by type, including pictures or photos, text  
564 descriptions, etc. (Paulheim et al., 2017), a form to better understand things by describing  
565 images and texts. Knowledge mapping is an identification method that forms knowledge  
566 discovery by aggregating various information (Ma et al., 2021). Chen et al. (2020) used  
567 knowledge mapping to construct the landslide semantic network, showing that the model can  
568 make an effective prediction in the case of small amounts of data. Zhang et al. (2023)  
569 presented the types and characteristics of regional fluvial facies in the form of knowledge  
570 mapping to construct the knowledge system of fluvial facies. Xu et al. (2023) systematically  
571 combed the technical methods and processes of constructing landslide knowledge mapping.  
572 They proposed that the process of constructing landslide knowledge mapping can be  
573 extended to other types of disasters.

574 The knowledge mapping for early identification of flash flood disasters requires b  
575 oth pictures and texts, that is, it can not only clearly understand the evolution process  
576 and corresponding characteristics of flash floods according to the pictures but also ac  
577 curately identify them according to the text descriptions. At present, although the cons  
578 truction of knowledge mapping, especially for flash flood, is still blank, we can try t  
579 o analyze it in combination with several other models in future research and propose  
580 a more scientific fusion model to provide new ideas for the construction of early iden  
581 tification models. Recently, we have simplified and concluded the three aspects of dis  
582 aster-causing factors, disaster-causing reasons and damage modes and summarized eigh  
583 t typical disaster-causing modes of water and sediment disasters as follows: rainstorm-  
584 flood-flooding mode, rainstorm-flood-blocking-backwatering mode, rainstorm-flood-outbu  
585 rst-flooding mode, rainstorm-flood-upper outburst and lower blocking-backwatering mod  
586 e, rainstorm-flood-sediment deposition-flooding mode, rainstorm-flood-sediment depositi  
587 on-diversion-flooding mode, rainstorm-flood-sediment deposition-submergence mode and  
588 rainstorm-flood-upper outburst and lower blocking-sediment deposition-backwatering m  
589 ode (Table 5). In the future, we will consider preparing each typical disaster-causing  
590 mode into knowledge mapping and specify the identification criteria to distinguish the  
591 types of flash flood disasters intuitively and conveniently.



592 **Table 5** Typical disaster mode.

| No. | Mode name                                                                         | Disaster causing factors                                                           | Characteristics of water and sediment anomalies                              | Hazard mode                                           |
|-----|-----------------------------------------------------------------------------------|------------------------------------------------------------------------------------|------------------------------------------------------------------------------|-------------------------------------------------------|
| 1   | Rainstorm-flood -flood model                                                      | Rainstorm, flood                                                                   | Runoff surge caused by rainstorm                                             | Flood inundation                                      |
| 2   | Rainstorm-flood-blockage-flood model                                              | Rainstorm, flood, river blockage                                                   | Runoff surge caused by rainstorm, rapid rise of water level due to backwater | Flood inundation                                      |
| 3   | Rainstorm-flood-break-flood model                                                 | Rainstorm, flood, collapse of water retaining structures                           | Collapse leading to a surge in runoff                                        | Flood impact, flushing and flooding                   |
| 4   | Rainstorm-flood-upper burst lower blockage-overflow model                         | Rainstorm, flood, collapse of water retaining structures river blockage            | Collapse leading to a surge in runoff                                        | Flood impact, inundation                              |
| 5   | Rainstorm-flood-sediment deposition-overflow model                                | Rainstorm, flood, sediment                                                         | Coupling of water and sediment leads to a surge in runoff                    | Water and sand flushing and flooding                  |
| 6   | Rainstorm-flood-sediment deposition-diversion -inundation model                   | Rainstorm, flood, sediment                                                         | Channel siltation and filling, diversion of water flow                       | Water and sand flushing and flooding                  |
| 7   | Rainstorm-flood-sediment deposition-submergence model                             | Rainstorm, flood, sediment                                                         | Runoff surge caused by rainstorm, sediment scouring and silting              | Water and sand flushing and flooding, cover with silt |
| 8   | Rainstorm-flood-upward collapse and downward blockage-sedimentation-overflow mode | Rainstorm, flood, sediment, collapse of water retaining structures, river blockage | Collapse leading to a surge in runoff, sediment scouring and silting         | Water sand impact, flushing and flooding, Inundation  |

593

594 *5.4. Reduce model uncertainty*

595 Although many scholars have researched and discussed the uncertainty of flash flood  
 596 disasters, such as random set theory, fuzzy set theory, possibility theory, etc., these methods  
 597 and theories have certain limitations. The complex of flash flood, uncertain models, and  
 598 diversified influencing factors, etc., make the accuracy of early identification difficult to meet  
 599 the needs, and there is a lack of the theories and methods of quantitative combination. For  
 600 example, it is a challenge to establish the criteria for determining typical disaster-prone  
 601 reaches. At present, the parameters in the empirical formula still need to be optimized. In the  
 602 future model construction process, it is necessary to consider the uncertainty of parameters  
 603 and structures, such as underlying surface conditions and fully integrate multi-source  
 604 spatiotemporal data to improve the model's reliability and identification accuracy.

605

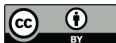

## 606 **6 Conclusions**

607 The development of the field can not only effectively predict and warn in advance,  
608 reduce casualties and property losses, but also provide scientific basis and favorable support  
609 for flash floods' prevention and control strategies. Given the suddenness, complexity,  
610 difference, and uncertainty of flash flood disasters, this paper summarizes the results in the  
611 field of early identification of flash floods based on bibliometric analysis and research  
612 practice and lists as follows:

613 (1) Bibliometrics: as a very active research field, it has attracted more and more attention  
614 from the academic circle in the past 40 years, and the number of documents published will  
615 continue to show an exponential upward trend in the future; the review papers are cited more  
616 times, but the total number of citations is too small to meet the demand, so the intensity of  
617 document review and research should be strengthened; the cooperation between authors is  
618 less, the author cluster is not obvious, but there is relatively more cooperation between  
619 countries; weather forecasting is the largest cluster, and keywords considering sediment  
620 factors also form a cluster, but the number of papers published is scarce.

621 (2) Water and sediment coupled disaster-causing mechanism: flash flood and sediment  
622 disasters usually occur in locations such as steep-gentle transition reach, curved reach,  
623 tributary confluence reach, bridge, and culvert reach; flash flood and sediment disasters have  
624 three chain characteristics, that is, orderly predictability of chain nodes, amplification of  
625 water and sediment variation disasters and coupling of disaster-causing factors at the  
626 watershed scale.

627 (3) Early identification model of flash floods: the deposits identified by remote sensing  
628 methods are incorporated into the data-driven intelligent model as a deposit factor. For  
629 sediment-laden watersheds, the model can improve the identification coverage of  
630 disaster-prone areas compared with the traditional models. Meanwhile, the hydrodynamic  
631 model suitable for the river scale is proposed, and the main controlling factors for sediment  
632 deposition and uplift in typical reaches are discovered based on the theoretical analysis of  
633 water and sediment dynamic processes in distinct reaches.

634 (4) Flash flood uncertainty: the influence of uncertainty reduction on the field is  
635 summarized from five aspects: influencing factors, data, models, evaluation units, and  
636 evaluation results. Carefully considering the influence of various uncertainties is the key to  
637 improving identification accuracy.



638           In conclusion, the research on the field is still in its infancy, and there are still a lot of  
639 gaps that urgently need to be studied. This paper enriches the document sample database,  
640 summarizes the research progress in this field, reveals the flash flood and sediment coupled  
641 disaster-causing mechanism, establishes early identification methods based on data-driven  
642 and water-sand dynamics, and analyzes the uncertainty sources of the model evaluation  
643 results and the suggestions for improving identification accuracy, so as to provide some  
644 reference for the early identification of flash flood disasters in the future.  
645



646 *Data availability.* No data sets were used in this article.

647

648 *Author contributions.* All authors contributed to the conceptualization of the paper and its  
649 contents. Heng Lu and Chao Liu developed the structure of the paper. Zhengli Yang wrote the  
650 paper, produced all figures and tables, and formatted the article. Kai Song, Zhijie Zhang, and  
651 Lei Ma produced the visualizations. Heng Lu, Ruihua Nie, Wanchang Zhang, and Chen Chen  
652 reviewed, revised, and supervised the progress of the paper. Min Zhang, and Gang Fan  
653 contributed to the conceptualization of ideas and to the writing and editing of the manuscript.

654

655 *Competing interests.* The contact author has declared that none of the authors has any  
656 competing interests.

657

658 *Acknowledgments.* This research was supported by the National Key R&D Program of China  
659 (2019YFC1510700), and the Sichuan Science and Technology Program (2023YFS0380,  
660 2023YFS0377, 2023NSFSC1989, 2022YFS0539).

661

662

663

664

665



666 **References**

- 667 Abbaszadeh, P., Muñoz, D.F., Moftakhari, H., Jafarzaghan, K., Moradkhani, H., 2022.  
668 Perspective on uncertainty quantification and reduction in compound flood modeli  
669 ng and forecasting. *Iscience*. 25(10). <https://doi.org/10.1016/j.isci.2022.105201>.
- 670 Ahmadisharaf, E., Kalyanapu, A.J., Bates, P.D., 2018. A probabilistic framework for fl  
671 ood plain mapping using hydrological modeling and unsteady hydraulic modeling.  
672 *Hydrolog. Sci. J.* 63(12), 1759-1775. [https://doi.org/10.1080/02626667.2018.152561](https://doi.org/10.1080/02626667.2018.1525615)  
673 5.
- 674 AL-Areeq, A.M., Sharif, H. O., Abba, S.I., Chowdhury, S., Al-Suwaiyan, M., Benaafi,  
675 M., Yassin, M.A., Aljundi, I.H. 2023. Digital elevation model for flood hazards  
676 analysis in complex terrain: Case study from Jeddah, Saudi Arabia. *Int. J. Appl.*  
677 *Earth Obs.*, 119, 103330. <https://doi.org/10.1016/j.jag.2023.103330>.
- 678 Bai, R., Wang, Z., Lu, H., Chen, C., Liu, X., Deng, G., He, Q., Ren, Z., Ding, B.,  
679 Ye, X., 2023. Earthquake-triggered landslide interpretation model of high resolutio  
680 n remote sensing imageries based on bag of visual word. *Earthq. Res. Adv.* 3(2),  
681 100196. <https://doi.org/10.1016/j.eqrea.2022.100196>.
- 682 Blöschl, G., Reszler, C., Komma, J., 2008. A spatially distributed flash flood forecasti  
683 ng model. *Environ. Modell. Softw.* 23(4), 464-478. [https://doi.org/10.1016/j.envsoft.](https://doi.org/10.1016/j.envsoft.2007.06.010)  
684 2007.06.010.
- 685 Bonnifait, L., Delrieu, G., Le Lay, M., Boudevillain, B., Masson, A., Belleudy, P., Ga  
686 ume, E., Saulnier, G.M., 2009. Distributed hydrologic and hydraulic modelling wit  
687 h radar rainfall input: Reconstruction of the 8 - 9 September 2002 catastrophic flo  
688 od event in the Gard region, France. *Adv. Water Resour.* 32(7), 1077-1089. [https://](https://doi.org/10.1016/j.advwatres.2009.03.007)  
689 [/doi.org/10.1016/j.advwatres.2009.03.007](https://doi.org/10.1016/j.advwatres.2009.03.007).
- 690 Borga, M., Stoffel, M., Marchi, L., Marra, F., Jakob, M., 2014. Hydrogeomorphic resp

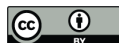

- 691        onse to extreme rainfall in headwater systems: Flash floods and debris flows. *J.*  
692        *Hydrol.* 518, 194-205. <https://doi.org/10.1016/j.jhydrol.2014.05.022>.
- 693        Brussee, A.R., Bricker, J.D., De Bruijn, K.M., Verhoeven, G.F., Winsemius, H.C., Jon  
694        kman, S.N., 2021. Impact of hydraulic model resolution and loss of life model m  
695        odification on flood fatality risk estimation: Case study of the Bommelerwaard, T  
696        he Netherlands. *J. Flood Risk Manag.* 2021, 14 (3) .
- 697        Chen, C., Zhang, L., 2023. Hydro-mechanical behaviour of soil experiencing seepage  
698        erosion under cyclic hydraulic gradient. *Géotechnique.* 73(2), 115-127. [https://doi.o](https://doi.org/10.1680/jgeot.20.P.340)  
699        [rg/10.1680/jgeot.20.P.340](https://doi.org/10.1680/jgeot.20.P.340).
- 700        Chen, C., Zhang, L. M., Shen, P., 2020. Influence of mineral dissolution on the mech  
701        anical behaviour of a granular assembly under complex stress states. *Int. J. Rock*  
702        *Mech. Min.* 136, 104546. <https://doi.org/10.1016/j.ijrmms.2020.104546>.
- 703        Chen, L., Ge, X., Yang, L., Li, W., Peng, L., 2023. An Improved Multi-Source Data-  
704        Driven Landslide Prediction Method Based on Spatio-Temporal Knowledge Graph.  
705        *Remote Sens.* 15(8), 2126. <https://doi.org/10.3390/rs15082126>.
- 706        Chen, X., Jia, S., Xiang, Y., 2020. A review: Knowledge reasoning over knowledge g  
707        raph. *Expert Syst. Appl.* 141, 112948. <https://doi.org/10.1016/j.eswa.2019.112948>.
- 708        Chen, Y., Xu, Z., Niu, C., 2021. Outlier detection method for flash flood disaster mo  
709        nitoring data based on information entropy. *IOP Conf. Ser.: J. Phy.* 2138(1): 0120  
710        13. <https://doi.org/10.1088/1742-6596/2138/1/012013>.
- 711        Chinh, L., Hang, H., Quynh, D.B., Ngoc-Dung, L., Dong, T.K., Hung, V., Dinh, Q.N.,  
712        2023. Flash flood and landslide susceptibility analysis for a mountainous roadway  
713        in Vietnam using spatial modeling. *Quaternary Science Advances.* Volume 11, 10  
714        0083. <https://doi.org/10.1016/j.qsa.2023.100083>.
- 715        Convertino, M., Annis, A., Nardi, F., 2019. Information-theoretic portfolio decision mo





- 716 del for optimal flood management. *Environ. Modell. Softw.* 119, 258-274. <https://doi.org/10.1016/j.envsoft.2019.06.013>.
- 717
- 718 Costache, R., Bui, D.T., 2020. Identification of areas prone to flash-flood phenomena  
719 using multiple-criteria decision-making, bivariate statistics, machine learning and th  
720 eir ensembles. *Sci. Total Environ.* 712, 136492. [https://doi.org/10.1016/j.scitotenv.2](https://doi.org/10.1016/j.scitotenv.2019.136492)  
721 019.136492.
- 722 Deal, E., Venditti, J.G., Benavides, S.J., Bradley, R., Zhang, Q., Kamrin, K., Perron, J.  
723 T., 2023. Grain shape effects in bed load sediment transport. *Nature*. 613(7943), 2  
724 98-302. <https://doi.org/10.1038/s41586-022-05564-6>.
- 725 Ding, L., Ma, L., Li, L., Liu, C., Li, N., Yang, Z., Yao, Y., Lu, H., 2021. A survey  
726 of remote sensing and geographic information system applications for flash floods.  
727 *Remote Sens.* 13: 1818. <https://doi.org/10.3390/rs13091818>.
- 728 Ding, W., Wang, X., Zhang, G., Meng, X., Ye, Z., 2022. Impacts of grass coverage a  
729 nd arrangement patterns on runoff and sediment yield in slope-gully system of the  
730 loess plateau, China. *Water*. 15(1), 133. <https://doi.org/10.3390/w15010133>.
- 731 Duan, L., Liu, C., Xu, H., Pan, H., Liu, H., Yan, X., Liu, T., Yang, Z., Liu, G., Dai,  
732 X., Zhang, D.H., Fu, X., Liu, X.M., Lu, H., 2022. Susceptibility assessment of fl  
733 ash floods: A bibliometrics analysis and review. *Remote Sens.* 14, 5432. [https://do](https://doi.org/10.3390/rs14215432)  
734 [i.org/10.3390/rs14215432](https://doi.org/10.3390/rs14215432).
- 735 Duan, W., He, B., Nover, D., Fan, J., Yang, G., Chen, W., Meng, H., Liu, C., 2016.  
736 Floods and associated socioeconomic damages in China over the last century. *Nat.*  
737 *Hazards.* 82, 401-413. <https://doi.org/10.1007/s11069-016-2207-2>.
- 738 Emery, C.M., Biancamaria, S., Boone, A., Garambois, P., Ricci, S., Rochoux, M.C.,  
739 Decharme, B., 2016. Temporal variance-based sensitivity analysis of the river-rout  
740 ing component of the large-scale hydrological model isba-trip: application on the

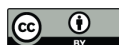

- 741 Amazon basin. *J. Hydrometeor.* 17, 3007-3027. <https://doi.org/10.1175/JHM-D-16-0>  
742 050.1.
- 743 Faisal, B.R., Hayakawa, Y.S., 2023. Geomorphometric characterization and sediment co  
744 nnectivity of the middle Brahmaputra River basin. *Geomorphology.* 429, 108665.  
745 <https://doi.org/10.1016/j.geomorph.2023.108665>.
- 746 Gan, B.R., Liu, X.N., Yang, X.G., Wang, X. K., Zhou, J.W., 2018. The impact of hu  
747 man activities on the occurrence of flash flood hazards: lessons from the 17 Aug  
748 ust 2015 flash flood/debris flow event in Xuyong County, south-western China. *G*  
749 *eomatics. Nat. Haz. Risk.* 9(1), 816-840. <https://doi.org/10.1080/19475705.2018.148>  
750 0539.
- 751 Guo, L., Zhang, X., Liu, R., Liu, Y. S., Liu, Q., 2017. Achievements and preliminary  
752 analysis on China national flash flood disasters investigation and evaluation. *J. G*  
753 *eo-Inf. Sci.* 19(012), 1547-1556. <https://doi.org/10.3724/SPJ.1047.2017.01548>
- 754 Ge, Q., Sun, H., Liu, Z., Wang, X., 2023. A data-driven intelligent model for landslid  
755 e displacement prediction. *Geol. J.* 58(6), 2211-2230. <https://doi.org/10.1002/gj.467>  
756 5.
- 757 Guo, Y., Ding, W., Xu, W., Zhu, X., Wang, X., Tang, W., 2022. Assessment of an al  
758 ternative climate product for hydrological modeling: a case study of the Danjiang  
759 river basin, China. *Water.* 14(7), 1105. <https://doi.org/10.3390/w14071105>.
- 760 Hampton, B.A., Horton, B.K., 2007. Sheetflow fluvial processes in a rapidly subsiding  
761 basin, Altiplano plateau, Bolivia. *Sedimentology.* 54(5), 1121-1148. [https://doi.org/](https://doi.org/10.1111/j.1365-3091.2007.00875.x)  
762 [10.1111/j.1365-3091.2007.00875.x](https://doi.org/10.1111/j.1365-3091.2007.00875.x).
- 763 He, J., Zhang, K., Liu, X., Liu, G., Zhao, X., Xie, Z., Lu, H., 2020. Vegetation resto  
764 ration monitoring in Yingxiu landslide area after the 2008 Wenchuan earthquake.  
765 *Earthq. Res.* 34, 157-166. <https://doi.org/10.19743/j.Cnki.0891-4176.202001007>.



- 766 Hu, Sy., Yu, M., Que, T. Fan, G., Xin, H., 2022. Individual willingness to prepare fo  
767 r disasters in a geological hazard risk area: an empirical study based on the prote  
768 ction motivation theory. *Nat. Hazards*. 110, 2087-2111. <https://doi.org/10.1007/s1106>  
769 9-021-05026-8.
- 770 Imaizumi, F., Gomi, T., Kobayashi, S., Negishi, J.N., 2009. Changes in bedload transp  
771 ort rate associated with episodic sediment supply in a Japanese headwater channel.  
772 *Catena*. 77(3), 207-215. <https://doi.org/10.1016/j.catena.2008.12.015>.
- 773 Islam, A.R.M.T., Talukdar, S., Mahato, S., Kundu, S., Eibek, K.U., Pham, Q.B., Kuriq  
774 i, A., Linh, N.T.T., 2021. Flood susceptibility modelling using advanced ensemble  
775 machine learning models. *Geosci. Front.* 12(3), 101075. <https://doi.org/10.1016/j.gs>  
776 f.2020.09.006.
- 777 Jafarzadegan, K., Alipour, A., Gavahi, K., Moftakhari, H., Moradkhani, H., 2021. Tow  
778 ard improved river boundary conditioning for simulation of extreme floods. *Adv.*  
779 *Water Resour.* 158, 104059. <https://doi.org/10.1016/j.advwatres.2021.104059>.
- 780 Khosravi, K., Pham, B.T., Chapi, K., Shirzadi, A., Shahabi, H., Revhaug, I., Prakash  
781 I., Bui, D.T., 2018. A comparative assessment of decision trees algorithms for flas  
782 h flood susceptibility modeling at Haraz watershed, northern Iran. *Sci. Total Envir*  
783 *on.* 627, 744-755. <https://doi.org/10.1016/j.scitotenv.2018.01.266>.
- 784 Lee, S., Choi, J., Woo, I., 2004. The effect of spatial resolution on the accuracy of l  
785 andslide susceptibility mapping: a case study in Boun, Korea. *Geosci. J.* 8, 51-60.  
786 <https://doi.org/10.1007/BF02910278>.
- 787 Li, C., Sun, D., Zhang, X., Liu, R., Tang, X.; Xue, H., 2021a. Flash flood early war  
788 ning upgrade at watershed scale. Eighth international conference on flood manage  
789 ment (ICFM8): lowering risk by increasing resilience. The University of Iowa, Io  
790 wa City, Iowa, USA August 9-11.



- 791 Li, C., Zhang, X., Sun, D., Xue, H., 2021b. Flash flood early warning improving at r  
792 iver basin scale-taking the shewei river basin as an example. Integrative J of Envi  
793 & Ear Sci. 01(01), 40-50.
- 794 Li, C., Zhang, X., Wang, H., Liu, X., 2022a. Miluo river pingjiang reach flood risk s  
795 essment. Academic J Eng Stud. 3(1), AES.000552.2022. <https://doi.org/10.31031/a>  
796 es.
- 797 Li, C., Zhang M., Li, Q., He, B., 2023. How to avoid heavy life losses in liulin-like  
798 flash flood events. Eighth international conference on flood management (ICFM9):  
799 river basin disaster resilience and sustainability by all. Tsukuba, Japan, on 19-21  
800 February.
- 801 Li, C., Zhang M., Zhang, X., Ma, Q., Wang, H., He, Y., Liu X., 2022b. Mountainous  
802 urban flood management capacity enhancement-a case Study of the Pingjiang city.  
803 Integrative J of Envi & Ear Sci. 02(01), 61-76.
- 804 Li, C., Zhang, X., Zhang, M., Li, H., Xue, H., 2022c. Village-oriented flash flood ris  
805 k assessment and application: case study of Xiaoji village, Henan, China. Academ  
806 ic J Eng Stud. 2(5). AES.000550.2022.
- 807 Li, J., Hong, D., Gao, L., Yao, J., Zheng, K., Zhang, B., Chanussot, J., 2022. Deep l  
808 earning in multimodal remote sensing data fusion: A comprehensive review. Int. J.  
809 Appl. Earth Obs., 112, 102926. <https://doi.org/10.1016/j.jag.2022.102926>.
- 810 Lin, Z., Han, Z., Hussan, W.U., Bai, Y., Wang, C., 2023. Upland river planform mor  
811 phodynamics and associated riverbank erosion: Insights from channel migration of  
812 the upper Yarlung Tsangpo river. Catena. 231, 107280. <https://doi.org/10.1016/j.cat>  
813 ena.2023.107280.
- 814 Liu, H., Du, J., Yi, Y., 2022. Reconceptualising flood risk assessment by incorporating  
815 sediment supply. Catena. 217, 106503. <https://doi.org/10.1016/j.catena.2022.106503>.



- 816 Liu, H., Xu, H., Bao H., Lu, H., Song, Q., Di, J., Wang, M., Cao, S., 2022. Optimiz  
817 ation experiment of early identification of landslides susceptibility areas in mediu  
818 m and small mountainous catchment based on ensemble learning. *Adv. Eng. Sci.*  
819 54(6), 12-20. <https://doi.org/10.15961/j.jsuese.202200733>.
- 820 Liu, C., Nie, R.H., Liu, X.N., Xu, W.L., 2020. Research conception and achievement  
821 prospect of key technologies for forecast and early warning of flash flood and se  
822 diment disasters in mountainous rainstorm. *Adv. Eng. Sci.* <https://doi.org/10.15961/j.jsuese.202000859>.
- 824 Liu, L., Ye, S., Chen, C., Pan, H., Ran, Q., 2021. Nonsequential response in mountai  
825 nous areas of southwest China. *Frontiers in Earth Science*. 9, 660244. <https://doi.org/10.3389/feart.2021.660244>.
- 827 Ma, L., Wang, J., Cheng, J., Wang, X., Zhu, W., 2021. MLRP-KG: Mine landslide ri  
828 sk prediction based on knowledge graph. *IEEE Transactions on Artificial Intellige*  
829 *nce*. 3(1), 78-87. <https://doi.org/10.1109/TAI.2021.3114652>
- 830 Majhi, A., Dhanya, C.T., Chakma, S., 2022. Quantification of model uncertainty in su  
831 b-daily extreme precipitation projections. *Global and Planetary Change*. 218, 10396  
832 7. <https://doi.org/10.1016/j.gloplacha.2022.103967>.
- 833 Marchi, L., Borga, M., Preciso, E., Gaume, E., 2010. Characterisation of selected extr  
834 eme flash floods in Europe and implications for flood risk management. *J. Hydrol.*  
835 394(1-2), 118-133. <https://doi.org/10.1016/j.jhydrol.2010.07.017>.
- 836 Merz, R., Blöschl, G., 2003. A process typology of regional floods. *Water Resour. Re*  
837 *s*. 39(12). <https://doi.org/10.1029/2002wr001952>.
- 838 Minea, I., Iosub, M., Hapciuc, O.E., Buruiiană, D., 2017. Identification of the potential  
839 flash floods risk areas in Romania using physiographic method. *International Mul*  
840 *tidisciplinary Scientific GeoConference: SGEM*, 17, 403-410. <https://doi.org/10.5593>

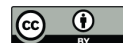

- 841 /sgem2017/31/S12.051.
- 842 Mofstakhari, H., Schubert, J.E., AghaKouchak, A., Matthew, R.A., Sanders, B.F., 2019.  
843 Linking statistical and hydrodynamic modeling for compound flood hazard assess  
844 ment in tidal channels and estuaries. *Adv. Water Resour.* 128, 28-38. [https://doi.or](https://doi.org/10.1016/j.advwatres.2019.04.009)  
845 [g/10.1016/j.advwatres.2019.04.009](https://doi.org/10.1016/j.advwatres.2019.04.009).
- 846 Panahi, M., Jaafari, A., Shirzadi, A., Shahabi, H., Rahmati, O., Omidvar, E., Lee, S.,  
847 Bui, D.T., 2021. Deep learning neural networks for spatially explicit prediction o  
848 f flash flood probability. *Geosci. Front.* 12(3), 101076. [https://doi.org/10.1016/j.gsf.](https://doi.org/10.1016/j.gsf.2020.09.007)  
849 [2020.09.007](https://doi.org/10.1016/j.gsf.2020.09.007).
- 850 Paulheim, Heiko. Knowledge graph refinement: A survey of approaches and evaluation  
851 methods. *Semantic Web.* 8(3), 489-508. <https://doi.org/10.3233/SW-160218>.
- 852 Prein, A.F., Langhans, W., Fosser, G., Ferrone, A., Ban, N., Goergen, K., Keller, M.,  
853 Tödle, M., Gutjahr, O., Feser, F., Brisson, E., Kollet, S., Schmidli, J., van Lipzig  
854 N.P.M., Leung, R., 2015. A review on regional convection - permitting climate m  
855 odeling: demonstrations, prospects, and challenges. *Rev. Geophys.* 53(2), 323-361.  
856 <https://doi.org/10.1002/2014RG000475>.
- 857 Prokešová, R., Horáčková, Š., Snopková, Z., 2022. Surface runoff response to long-ter  
858 m land use changes: Spatial rearrangement of runoff-generating areas reveals a shi  
859 ft in flash flood drivers. *Sci. Total Environ.* 815, 151591. [https://doi.org/10.1016/j.](https://doi.org/10.1016/j.scitotenv.2021.151591)  
860 [scitotenv.2021.151591](https://doi.org/10.1016/j.scitotenv.2021.151591).
- 861 Ran, Q., Wang, J., Chen, X., Liu, L., Li, J., Ye, S., 2022. The relative importance of  
862 antecedent soil moisture and precipitation in flood generation in the middle and l  
863 ower Yangtze River basin. *Hydrol. Earth Syst. Sci.* 26(19), 4919-4931. [https://doi.](https://doi.org/10.5194/hess-26-4919-2022)  
864 [org/10.5194/hess-26-4919-2022](https://doi.org/10.5194/hess-26-4919-2022).
- 865 Sathya, K., Rahardjo, A. P., Jayadi, R., 2021. Flash flood disaster reconstruction for e



- 866       stimating the available warning time, the case in sempor river on 21st of february  
867       2020, mt. Merapi slope, yogyakarta special region. IOP Conf. Ser.: Earth Enviro  
868       n. Sci. <https://doi.org/10.1088/1755-1315/930/1/012080>.
- 869       Schumacher, R.S., Herman, G.R. 2021. Reply to “Comments on ‘Flash Flood Verificat  
870       ion: Pondering Precipitation Proxies’”. J. Hydrometeorol., 22(3), 749-752. <https://doi.org/10.1175/JHM-D-20-0275.1>.
- 871       i.org/10.1175/JHM-D-20-0275.1.
- 872       Siebert, C., Rödiger, T., Geyer, S., Laronne, J. B., Hillel, N., Sauter, M., Mallast, U.,  
873       2016. Multidisciplinary investigations of the transboundary Dead Sea basin and it  
874       s water resources. Integrated water resources management: Concept, research and i  
875       mplementation. 107-127. [https://doi.org/10.1007/978-3-319-25071-7\\_5](https://doi.org/10.1007/978-3-319-25071-7_5).
- 876       Špitalar, M., Gourley, J.J., Lutoff, C., Kirstetter, P. E., Brilly, M., Carr, N., 2014. Ana  
877       lysis of flash flood parameters and human impacts in the US from 2006 to 2012.  
878       J. hydro. 519, 863-870. <https://doi.org/10.1016/j.jhydrol.2014.07.004>.
- 879       Sun, T., Wang X.K., Yan, X.F, 2021. Analysis of the impact of sediment on flood dis  
880       aster in shouxi river basin, in water disaster mitigation and water environment reg  
881       ulation. In: The 2nd Water Disaster Mitigation and Water Environment Regulation  
882       (WDWE2021).
- 883       Suwanno, P., Yaibok, C., Pornbunyanon, T., Kanjanakul, C., Buathongkhue, C., Tsumit  
884       a, N., Fukuda, A., 2023. GIS-based identification and analysis of suitable evacuati  
885       on areas and routes in flood-prone zones of Nakhon Si Thammarat municipality. I  
886       ATSS research. 47(3), 416-431. <https://doi.org/10.1016/j.iatssr.2023.08.004>.
- 887       Tehrany, M.S., Pradhan, B., Jebur, M.N., 2014. Flood susceptibility mapping using a n  
888       ovel ensemble weights-of-evidence and support vector machine models in GIS. J.  
889       Hydro. 512, 332-343. <https://doi.org/10.1016/j.jhydrol.2014.03.008>.
- 890       Tu, H., Wang, X., Zhang, W., Peng, H., Ke, Q., Chen, X., 2020. Flash flood early w



- 891 arning coupled with hydrological simulation and the rising rate of the flood stage  
892 in a mountainous small watershed in Sichuan Province, China. *Water*. 12(1), 255.  
893 <https://doi.org/10.3390/w12010255>.
- 894 Wang, X.K., Liu, X.N., Zhou, J.W., 2019. Research Framework and Anticipated Results  
895 of Flash Flood Disasters Under the Mutation of Sediment Supply. *Adv. Eng. Sci.*  
896 51(04), 1-10. <https://doi.org/10.15961/j.jsuese.201900261>.
- 897 Xie, H., Xu, W., Liu, C., Yang, X., Xie, H., Nie, R., Zhou, J., 2018. Water disasters  
898 and their countermeasures in mountains. *Adv. Eng. Sci.* 50(3), 1-14. <https://doi.org/10.15961/j.jsuese.201800345>.
- 900 Xu, Q., Cui, S., Huang, W., Pei, X., Fan, X., Ai, Y., Zhao, W., Luo, Y., Luo, J., Liu,  
901 M., Xia, M., Wang, F., Peng, D., Zheng, G., Chen, W., 2023. Construction of a  
902 landslide knowledge graph in the field of engineering geology. *Geomatics and In-*  
903 *f. Sci. Wuhan Uni.* 48(10), 1601-1615. <https://doi.org/10.13203/j.whugis20230245>.
- 904 Yan, X.F., Xu, H., Lu, H., Zhou, J.W., Wang X.K., Wang, L., 2021. Assessment and  
905 analysis of a rainfall - time-lagging water-related disaster in mountainous areas. *Fr-*  
906 *ont. Earth Sci.* 9, 659708. <https://doi.org/10.3389/feart.2021.659708>.
- 907 Yan, X.F., Xu, Z.X., Sun, T., Wang X.K., 2021. Numerical experimental study on flas-  
908 h flood related to sediment transport at local diverging-converging sections in mo-  
909 untainous rivers. *Adv. Eng. Sci.* 53(6), 148-154. [https://doi.org/10.15961/j.jsuese.20](https://doi.org/10.15961/j.jsuese.202100134)  
910 [2100134](https://doi.org/10.15961/j.jsuese.202100134).
- 911 Yan, X.F., Yao Z.D., Xu, H., Dan, Z., 2022. Investigation of water transport character-  
912 istics in converging and diverging channels. *Adv. Eng. Sci.* 54(6), 43-50. [https://d](https://doi.org/10.15961/j.jsuese.202200771)  
913 [oi.org/10.15961/j.jsuese.202200771](https://doi.org/10.15961/j.jsuese.202200771).
- 914 Yang, Z., Yuan, X., Liu, C., Nie, R., Liu, T., Dai, X., Ma, L., Tang, M., Xu, Y., Lu,  
915 H., 2022. Meta-Analysis and Visualization of the Literature on Early Identificatio





- 916 n of Flash Floods. *Remote Sens.* 14, 3313. <https://doi.org/10.3390/rs14143313>.
- 917 Ye, S., Liu, L., Chen, X., Li, P., Xu, G., Ran, Q., 2022. The variability of stable wat  
918 er isotopes and the young water fraction in a mountainous catchment. *Clean-soil,*  
919 *Air, Water.* 50(7), 2100337. <https://doi.org/10.1002/clen.202100337>.
- 920 Youssef, A. M., Pradhan, B., Hassan, A. M., 2011. Flash flood risk estimation along  
921 the St. Katherine road, southern Sinai, Egypt using GIS based morphometry and s  
922 atellite imagery. *Envi. Earth Sci.* 62(3), 611-623. <https://doi.org/10.1007/s12665-010>  
923 -0551-1.
- 924 Yuan, X., Liu, C., Lu, H., Nie, R., Chen, C., Liu, T., Wang, D., Tang, M., Yang, Z.,  
925 2022. Analysing evolution characteristics of landslide deposits in Shouxi RiverBasi  
926 n in the Wenchuan earthquake zone. *Adv. Eng. Sci.* 54(6), 32-42. <https://doi.org/1>  
927 0.15961/j.jsuese.202200732.
- 928 Yuan, X., Liu, C., Nie, R., Yang, Z., Li, W., Dai, X., Cheng, J., Zhang, J., Ma, L.,  
929 Fu, X., Tang, M., Xu Y., Lu, H., 2022. A comparative analysis of certainty factor  
930 -based machine learning methods for collapse and landslide susceptibility mapping  
931 in wenchuan county, China. *Remote Sens.* 14, 3259. <https://doi.org/10.3390/rs1414>  
932 3259.
- 933 Yuan, Y., Zhao, J. Q., Xie, W., Luo, P.A., 2021. Hydraulic characteristics of microben  
934 d river with vegetation on the slope. *IOP Conf. Ser.: Earth Environ. Sci.* 691, 01  
935 2017. <https://doi.org/10.1088/1755-1315/691/1/012017>.
- 936 Zee, C.H., Zee, R., 2017. Formulas for the transportation of bed load. *J. Hydraul. En*  
937 *g.* 143(4), 04016101. [https://doi.org/10.1061/\(asce\)hy.1943-7900.0001248](https://doi.org/10.1061/(asce)hy.1943-7900.0001248)
- 938 Zhang, L., Hou, M., Chen, A., Zhong, H., Ogg, J.G., Zheng, D., 2023. Construction  
939 of a fluvial facies knowledge graph and its application in sedimentary facies ident  
940 ification. *Geosci. Front.* 14(2), 101521. <https://doi.org/10.1016/j.gsf.2022.101521>.

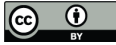

- 941 Zhang, P., Sun, W., Xiao, P., Yao, W., Liu, G., 2022. Driving factors of heavy rainfall  
942 l causing flash floods in the middle reaches of the yellow river: A case study in  
943 the wuding river basin, China. *Sustainability*. 14, 8004. <https://doi.org/10.3390/su14>  
944 138004.
- 945 Zhang, R., Chen, Y., Zhang, X., Ma, Q., Ren, L. 2022. Mapping homogeneous regions  
946 for flash floods using machine learning: A case study in Jiangxi province, China.  
947 *Int. J. Appl. Earth Obs.*, 108, 102717. <https://doi.org/10.1016/j.jag.2022.102717>.
- 948 Zhang, X., Huang, Y., Zhang, C., Ye, P., 2022. Geoscience Knowledge Graph (GeoK  
949 G): Development, construction and challenges. *Transactions in GIS*. 00, 1-15. <https://doi.org/10.1111/tgis.12985>.
- 950
- 951 Zhou, Y., Li, Z., Yao, S., Shan, M., Guo, C., 2021a. Case study: Influence of three g  
952 orges reservoir impoundment on hydrological regime of the acipenser sinensis spa  
953 wning ground, yangtze river, China. *Front. Ecol. Evol.* 9, 624447. <https://doi.org/10.3389/fevo.2021.624447>.
- 954
- 955 Zhou, Y., Lu, J., Jin, Z., Li, Y., Gao, Y., Liu, Y., Chen, P., 2021b. Experimental stud  
956 y on the riverbed coarsening process and changes in the flow structure and resist  
957 ance in the gravel riverbed downstream of dams. *Front Env Sci.* 9, 611668. <https://doi.org/10.3389/fenvs.2021.611668>.
- 958

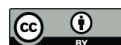

959 **List of Figure Captions**

960 **Figure 1** Complete chain of disaster caused by coupling of mountain torrents, water and  
961 sediment

962 **Figure 2** Construction process of literature sample library

963 **Figure 3** Number of publications.

964 **Figure 4** Visual network co word analysis

965 **Figure 5** Research topic clustering results.

966 **Figure 6** Sections where sediment is prone to sedimentation.

967 **Figure 7** Data driven model technology flowchart

968 **Figure 8** The identification results of this high-risk area

969 **Figure 9** Comparison of research results based on hydrodynamic methods and national flash  
970 flood risk investigation and assessment.

971 **Figure 10** Research time zone map: sediment transport correlation

972

973



974 **List of Table Captions**

975 **Table 1** Establishment status of the document database.

976 **Table 2** Highly cited literature information table (TOP 10)

977 **Table 3** Clustering of literature co-citation profiles

978 **Table 4** Typical cases that have an impact on evaluation results

979 **Table 5** Typical disaster mode.

980

981

982
